# Supplementary material for: Middle East Respiratory Syndrome Infection Control and Prevention Guideline for Healthcare Facilities
Source: PubMed Central journal article supplement — Infect Chemother. 2015 Dec 30;47(4):278–302. doi: 10.3947/ic.2015.47.4.278 (PMC4716282; doi:10.3947/ic.2015.47.4.278), 2015-12-30
Supplement: ic-47-278-s001.pdf [file ic-47-278-s001.pdf]

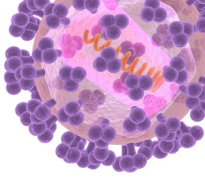

## 메르스 의료기관 감염관리지침

김진용<sup>1</sup>, 송준영<sup>2</sup>, 윤영경<sup>3</sup>, 최성호<sup>4</sup>, 송영구<sup>5</sup>, 김성란<sup>6</sup>, 손희정<sup>7</sup>, 정선영<sup>8</sup>, 최정화<sup>9</sup>, 김경미<sup>10</sup>, 윤희정<sup>11</sup>, 최준용<sup>12</sup>, 김태형<sup>13</sup>, 최영화<sup>14</sup>, 김홍빈<sup>15</sup>, 윤지현<sup>16</sup>, 이재갑<sup>17</sup>, 엄중식<sup>18</sup>, 이상오<sup>19</sup>, 오원섭<sup>20</sup>, 최정현<sup>21</sup>, 유진홍<sup>21</sup>, 김우주<sup>2</sup>, 정희진<sup>2</sup>

<sup>1</sup>인천광역시의료원 감염내과; <sup>2</sup>고려대학교 의과대학 구로병원 감염내과; <sup>3</sup>고려대학교 의과대학 안암병원 감염내과; <sup>4</sup>중앙대학교 의과대학 중앙대학교병원 감염내과; <sup>5</sup>연세대학교 의과대학 강남세브란스병원 감염내과; <sup>6</sup>고려대학교 구로병원 감염관리실; <sup>7</sup>이화여자대학교 목동병원 감염관리실; <sup>8</sup>건양대학교 간호대학; <sup>9</sup>건국대학교 서울병원 감염관리실; <sup>10</sup>가톨릭대학교 간호대학; <sup>11</sup>서울특별시 서북병원 감염내과; <sup>12</sup>연세대학교 의과대학 세브란스병원 감염내과; <sup>13</sup>순천향대학교 의과대학 서울병원; <sup>14</sup>아주대학교 의과대학 감염내과; <sup>15</sup>서울대학교 의과대학 감염내과; <sup>16</sup>대전 을지대학교병원 감염내과; <sup>17</sup>한림대학교 의과대학 강남성심병원 감염내과; <sup>18</sup>한림대학교 의과대학 강동성심병원 감염내과; <sup>19</sup>울산대학교 의과대학 서울아산병원 감염내과; <sup>20</sup>강원대학교 의과대학 강원대학교병원 감염내과; <sup>21</sup>가톨릭대학교 의과대학 감염내과

Middle East Respiratory Syndrome (MERS) is an acute viral respiratory illness with high mortality caused by a new strain of betacoronavirus (MERS-CoV). Since the report of the first patient in Saudi Arabia in 2012, large-scale outbreaks through hospital-acquired infection and inter-hospital transmission have been reported. Most of the patients reported in South Korea were also infected in hospital settings. Therefore, to eliminate the spread of MERS-CoV, infection prevention and control measures should be implemented with rigor. The present guideline has been drafted on the basis of the experiences of infection control in the South Korean hospitals involved in the recent MERS outbreak and on domestic and international infection prevention and control guidelines. To ensure efficient MERS-CoV infection prevention and control, care should be taken to provide comprehensive infection control measures including contact control, hand hygiene, personal protective equipment, disinfection, and environmental cleaning.

**Key Words:** Middle east respiratory syndrome coronavirus; Infection control; Personal protective equipment; Quarantine; Disinfection

### 배경 및 목적

메르스(Middle East Respiratory Syndrome, MERS)는 2012년 중동에서 처음 발생한 급성호흡기중후군으로 환자 발생 지역은 중동뿐만 아니라 세계 각지로 점차 퍼져 나가는 양상을 보이고 있다. 2015년 5월, 대한민국에 메르스 유입 후 186명의 감염자와 36명의 사망자를 보이고 두달 만에 유행이 종식되었다[1, 2].

메르스를 일으키는 병원체는 코로나바이러스의 일종으로 사스(Severe Acute Respiratory Syndrome, SARS) 코로나바이러스와 같은 계열로 분류되지만 기존의 코로나바이러스와 달리 사스나 메르스 코로나바이러스는 상부기도에 염증을 일으킬 뿐만 아니라 하부기도

까지 침범을 하는 경우가 훨씬 많고 그에 따른 치명적인 폐손상이 사망률을 높이는 것으로 알려져 있다. 보통 2-14일, 평균 5-7일의 잠복기(노출부터 증상 발생까지의 기간)를 거쳐 초기에는 주로 발열을, 5일 정도 후에 호흡기 증상이 나타나는 경우가 많다[3]. 폐를 침범한 경우에는 기계호흡기의 도움이 필요하기도 하고 에크모(extracorporeal membrane oxygenation, ECMO)나 혈액투석 치료를 요하기도 한다. 주로 만성질환자나 의료인이 이환되며, 치사율이 높은 만큼 다른 감염병보다도 병원감염 관리지침의 준수가 매우 중요하다.

본 지침은 2015년 대한민국에서의 메르스 유행에 대한 대응 경험과 근거를 바탕으로 향후 메르스코로나바이러스에 의한 감염전파 차단에 도움이 될 수 있게 작성하였다.

Received: December 1, 2015

Corresponding Author : Hee Jin Cheong, MD, PhD

Division of Infectious Diseases, Department of Internal Medicine, Korea University Guro Hospital, 148 Gurodong-ro, Guro-gu, Seoul 08308, Korea

Tel: +82-2-2626-3050, Fax: +82-2-2626-1105, E-mail: heejinmd@medimail.co.kr

## 범위와 대상

본 치료지침은 메르스 환자에 대한 의료기관 내에서 격리 진료실의 운영, 접촉자 관리, 개인보호구 착용, 환경 청소 및 소독 등 감염관리 원칙에 대한 것만 다루었다. 메르스 코로나바이러스 감염의 진단과 관련된 실험실 감염관리에 대해서는 별도로 발표될 실험실 진단 지침에서 다를 예정이기 때문에 이 부분에 대해서는 본 지침에서 자세히 다루지 않았다. 메르스 코로나바이러스 노출 후의 예방적 항바이러스제 사용에 관해서는 관련 근거가 부족하여 본 지침에서 다루지 않고자 한다.

## 지침개발위원회 구성

2015년 7월 대한감염학회, 대한의료관련감염학회, 감염관리간호사회의 공동 주관으로 전문가를 추천 받아 메르스 코로나바이러스 감염관리지침 개발위원회를 구성하였다. 위원회는 감염내과전문의 6인과 감염관리전문간호사 4인으로 구성되었다.

## 문헌검색방법

2012년 이후에 출판된 메르스 코로나바이러스 감염관리지침과 관련된 문헌을 검색하였다. PubMed (www.pubmed.gov)를 이용해 검색하였으며, ‘middle east respiratory syndrome’, ‘infection control’, ‘quarantine’, ‘environmental cleaning’, ‘disinfectant’, ‘transmission’ 등의 검색어를 조합하여 사용하였다.

## 권고의 강도 및 근거수준 결정

권고의 강도와 근거수준은 Infectious Diseases Society of America (IDSA)의 지침에서 주로 사용하는 것을 일부 수정하여 사용했다 (Table 1). 각 핵심 권고안은 10명의 전문가 패널회의를 통해 결정되었다. 결정된 핵심 권고안을 지침개발위원과 외부 감염전문가들에게 평가를 받아서 권고안 및 권고 강도를 수정하여 지침을 작성하였다. 메르스 민관합동 대책반의 메르스 즉각 대응팀 감염전문가들의 검토를 받았고, 검토 사항을 지침에 반영하였다.

**Table 1.** 권장강도와 근거수준

| Strength of recommendation     | Quality of evidence for recommendation                        |
|--------------------------------|---------------------------------------------------------------|
| A: Should always be offered    | I: One or more properly designed randomized, controlled trial |
| B: Should generally be offered | II: One or more well-designed, nonrandomized trial            |
| C: Optional                    | III: Expert opinion, descriptive studies                      |

## 의료기관 감염관리지침

### 1. 감염관리 기본원칙

| 핵심 권고안                                                                                           |
|--------------------------------------------------------------------------------------------------|
| 1. 감염 관리의 핵심은 의심 및 감염 환자의 ‘조기 진단’ 및 ‘병원 내 격리’를 통한 전파 차단이다(AIII).                                 |
| 2. 메르스 감염대책위원회를 구성하여 감염 관리의 기본 요소인 구조(structure), 시스템(system), 실행과정(processes)을 합리적으로 관리한다(BII). |
| 3. 의심 및 확진 환자를 조기 식별해서 접촉 및 비말 주위를 적용하며, 감염원 조절을 위해 격리 조치한다(AIII).                               |
| 4. 임상, 역학 및 실험실적 평가를 최대한 신속하게 실시하여 보고하는 동시에 감염 관리 기반 시설을 구축해야 한다(AIII).                          |
| 5. 적절한 환기 시설을 갖춘 독립된 공간에 의심 및 확진 환자를 배치하고, 효과적으로 환경을 소독해서 원내 전파를 방지한다(AII).                      |
| 6. 의료진은 의심 및 확진 환자 접촉 시 장갑, 가운, 고효율 마스크, 고글 또는 안면가리개를 올바른 순서와 방법에 따라 착용한다(AII).                  |
| 7. 의심 및 확진 환자는 일반 환자와 접촉을 피할 수 있도록 별도의 동선을 이용하며 이동 시 환자에게 일반 마스크, 가운, 장갑을 착용시킨다(AIII).           |

#### 1) 일반원칙

국내 메르스 바이러스 감염 대유행은 의료기관 내 방문 및 입원 환자들을 중심으로 발생하였다[3]. 이런 양상은 사우디아라비아의 메르스 환자들의 주요감염 경로와 유사하게, ‘수퍼전파자’와 ‘병원 내 감염’을 통해 발생한 특징을 보이고 있다[4]. 따라서, 메르스 바이러스 감염 관리는 의심 및 감염 환자의 ‘조기 진단’ 및 ‘병원 내 격리’를 통한 전파 차단이 가장 중요하다(AIII) [5-7].

메르스 바이러스 감염 노출 및 전파를 최소화하기 위해서는 ‘표준, 접촉 및 비말 주의(standard, contact & droplet precaution)’를 기반으로 체계적인 감염 관리를 시행한다(AIII). 예외적으로, 세계보건기구는 메르스 환자 치료 중 에어로졸을 발생시키는 처치(인공호흡기, 기관 내 삽관, 가래 제거)를 하는 경우 ‘공기 전파주의(airborne precaution)’를 권고하고 있다(AIII) [8-10].

지역 사회 의료 기관과 보건소 및 질병관리본부 등 국가 기관은 유행 상황에 대해 효과적인 의사소통 방안을 수립하여 실시간 정보를

공유하도록 노력해야 한다(CIII) [11].

2) 메르스 감염대책위원회 구성

기존 감염관리실이 있는 병원은 감염관리위원회로 메르스 감염대책위원회를 구성한다(Table 2). 병원장을 위원장으로 하며, 환자 접점 부서, 감염관리실, 진단검사의학과, 시설팀, 원무팀, 영양팀 등 여러 분야에 걸친 인력들을 포함해야 한다. 특히, 정책과 시행을 집중 관리하기 위한 감염관리 전담 인력이 포함되어야 한다(AII) [11, 12].

위원회의 구성원들은 원내 전파를 방지하기 위해서 메르스 감염관리대책을 조율하고 효과적으로 실행될 수 있도록 24시간 주야로 연락체계를 가동한다. 근거 중심의 감염 관리 프로그램을 실시간으로 도출하여 실행하고, 순응도 및 효과를 평가한다. 부서간의 협업을 지원 및 자문하고 교육한다. 특히, 감염 관리의 기본 요소인 구조(structure), 시스템(system), 실행과정(processes)을 합리적으로 관리한다[13].

3) 감염관리의 기본요소

메르스 감염 예방 및 관리 정책의 기본 요소는 행정관리, 환경 및 시설관리 그리고 개인보호구(personal protective equipment, PPE) 착용이다[11].

행정관리는 감염 예방 및 관리 전략 중 가장 핵심적인 요소이다. 의심 및 확진환자를 조기 식별해서 접촉 및 비말 주의를 적용하며, 감염원 조절을 위해 격리 조치한다(AIII). 의심 또는 확진 환자에 대한 임상, 역학 및 실험실적 평가를 최대한 신속하게 실시하여 보고할 수 있어야 한다[14], 이와 같은 환자관리 및 실험실적 평가를 위한 감염 관리 기반 시설이 을 구축되어야 한다(AIII) [15]. 또한, 감염관리위원회와 숙련된 전문인력을 활용해 관련 지침을 근거로 의료 서비스의 공급과 저장 물품 사용 정책을 체계적으로 시행해야 한다. 정책 시행 과정에서 지속적으로 기반 시설을 관리하고, 직원 배치 및 관련 의료물품 제공을 권장하며, 의료진, 환자, 방문객을 대상으로 한 교육을 시행해야 한다(BII) [16, 17]. 또한, 대기 환자 및 입원 환자 배치를 관리하면서 진료 대기 구역의 과밀 방지 정책을 시행해야 한다. 의료인의 다면적 건강 관리 및 의료인에 대한 급성 호흡기 감염 감시를 실시한다. 손위생을 포함한 원내 감염관리 정책의 순응도를 지속적으로 평가

하고 관리해야 한다(CII) [18, 19].

병원 시설에 대한 환경 및 기술관리 또한 매우 중요하다[20]. 적절한 환기, 올바른 환자 배치 및 효과적인 환경 소독이 원내 전파를 방지한다(AII) [21]. 의심 및 확진 환자는 적절한 환기 시설을 갖춘 독립된 공간에 배치하며 한다(AII) [5, 22, 23]. 하루 1회 이상 환기 시설 및 음압 시설을 적절한 유지여부를 확인한다. 급성 호흡기 질환 환자들뿐 아니라 다른 사람들과도 격리 진료소 대기 중 혹은 입원 환자 간의 침상 간격을 2m 이상의 간격을 두고 배치한다(CIII) [15].

PPE는 가운, 장갑, 가운, 고효율 마스크, 고글 또는 안면가리개를 포함하며, 올바르게 일관성 있게 착용해야 한다(AII) [17]. 개인보호구가 가장 표면에 드러나는 조절 방안이지만, 가장 취약할 수 있는 방안이다[7]. 따라서, 행정적 관리와 환경 및 기술적 관리를 시행하는 동시에 적절한 손위생이 개인보호구 착용과 함께 실시되어야 한다[24].

4) 선별 데스크와 격리 진료소 운영

의심 및 확진 환자의 신속한 진단 및 격리를 위해 선별데스크 및 격리진료소를 마련한다(AII) [25]. 선별데스크는 병원에 내원하는 모든 사람들을 대상으로 모든 출입구 및 응급실 등의 진료 장소에서 발열 및 호흡기 증상 등을 감시하고, 의심 및 확진 환자를 조기 선별하는 주요 시스템이다(BII) [16]. 선별데스크에 배치된 의료진은 정형화된 문진표를 활용하여 격리 진료소 진료 대상 환자를 분류할 수 있다. 그리고, 선별데스크에서 방명록을 작성하도록 함으로써 내원하는 모든 사람들의 신원을 파악하여, 확진 환자 발생시 접촉 위험도 평가에 활용할 수 있다(BIII). 선별진료소에서 격리 진료소 진료 대상 환자로 분류되면 환자는 일반 마스크를 착용하고 의료진과 함께 별도로 마련된 동선을 따라 격리진료소로 이동한다.

격리진료소는 의심 환자를 진료하는 공간이다. 모든 출입구와 응급실 및 진료 공간에 발열 및 호흡기 증상이 있는 환자는 의료진과 상담할 수 있도록 안내문을 게시한다[11].

격리 진료소는 효과적인 환기가 이루어지는 독립된 공간에 설치한다(AII) [11]. 원내에 설치하는 경우에는 다른 구역의 공기를 오염시키지 않는 위치에 설치한다. 즉, HEPA필터를 통한 배기시스템이 있는 곳이나 독립된 공기조화시스템으로 배기가 이루어지는 장소를 이용한다. 진료소 주변에 안내 표지판을 통해 구획을 긋고, 관계자 이외의 접근을 방지하며, 보호자 출입도 제한한다. 진료소 안 곳곳에 접촉 및 비말 주의 원칙을 교육용으로 게시한다. 진료소 방문 환자들은 일반 환자들과의 접촉을 최소화하는 동선을 구축하며, 격리 진료소 환자들의 동선은 한 방향으로 진행되게 마련한다. 진료 대기 공간은 되도록 야외 공간에 각 환자 사이에 2m 이상의 간격을 두어 마련하고, 모든 진료 대기자들은 일반 마스크를 착용하도록 한다(BII) [5]. 증상이 있는 환자와 무증상 환자를 구분하여 대기 시킨다(BII) [5]. 증상이 있는 환자는 경증 및 중증으로 분류하여 관리하고, 무증상 접촉자도 노출 정도에 따라 분류한다(BII) [5]. 긴 대기 시간으로 진료 대기실이 과밀화 되지 않도록 신속한 순환 시스템을 마련한다(CIII) [26, 27]. 진료 공간은 음압 공간에 HEPA필터를 설치하거나 제한적인 설비 조건에

Table 2. 메르스 감염대책위원회 구성

| 구분    | 위원 구성    |        |
|-------|----------|--------|
| 위원장   | 병원장      |        |
| 당연직위원 | 내과과장     | 수술실장   |
|       | 감염관리실장   | 약제팀장   |
|       | 감염관리사    | 중앙공급실장 |
|       | 진단검사의학과장 | 원무팀장   |
|       | 간호부장     | 영양팀장   |
|       | 응급의학과장   | 총무팀장   |
|       | 중환자실장    | 시설팀장   |

서는 시간당 12회 이상 공기 순환이 되어야 하며, 개인 보호구를 갖춘 의료진이 진료를 시행한다(BII) [28]. 진료 공간 내에는 의료진 세면대, 손소독제 및 손위생 물품(액체 비누, 종이 타월), 사용한 종이 수건과 휴지 및 장갑 처리를 위한 손잡이 없는 폐기물 용기를 구비한다.

검체 채취 공간은 감염이 의심되는 환자가 감염성 입자를 유발할 수 있는 공간이므로, 여과 없이 공기가 재순환되어서는 안 된다(BII). 따라서, HEPA필터가 설치된 음압 공간을 사용하거나 환기 장치가 없는 경우 HEPA필터를 이용하여 시간당 12회 이상 공기 순환 시설을 갖추어야 한다(Table 3) [28]. 검체 채취 공간에는 검체 채취에 대한 안내문을 게시하여 환자 스스로 객담 채취를 시행하게 하거나 개인 보호구를 갖춘 의료인이 인후두 도말 검체를 채취하도록 한다(BIII). 환자 퇴실 시 손위생을 반드시 시행할 수 있도록 하며, 각 환자에게 노출된 환경은 소독을 반복한다. 감염병이 의심되는 환자가 방을 떠나면 감염성 입자의 제거를 위해 충분한 시간이 경과될 때까지 출입을 제한한다(AIII).

영상의학적 검사 공간 역시 HEPA필터가 설치된 음압 공간을 사용하거나 환기 장치가 없는 경우 HEPA필터를 이용하여 시간당 12회 이상 공기 순환 시설을 갖추어야 한다(Table 3) (BIII) [28]. 독립된 공간에서 휴대용 설비를 이용하고, 각 환자에게 노출된 환경은 소독을 반복하며, 시간당 12회 공기 순환을 기준으로 30분 이후 출입한다(Ta-

ble 3) (AIII) [28].

5) 격리병실

격리 병실은 의심 및 확진 환자의 입원 치료를 위한 공간이다. 격리 병실은 HEPA필터가 설치된 음압 공간을 사용하고, 환기 장치가 없는 경우 여과 없이 배출된 내부 공기가 다시 내부로 유입되지 않도록 한다. 개인 화장실, 환자 세면대, 의료진 세면대, 손세정제가 설치된 1인 격리실을 사용한다(AIII) [29]. 개인 보호구 착용 및 탈의를 위한 전실을 마련한다. 격리실 밖과 소통할 수 있는 전화 등의 소통 장치를 마련하고, 소지품 및 가구는 최소화한다. 해당 환자용 청진기, 체온계, 혈압계 및 컵을 구비한다. 사용한 종이 수건, 휴지, 장갑 처리를 위한 손잡이가 없는 폐기물 용기와 손 위생을 위한 물품(액체비누, 로션, 종이 타월, 손소독제 구비)을 마련한다.

6) 환자 및 의료진 동선

의심 및 확진 환자는 일반 환자와 접촉을 피할 수 있도록 별도의 동선을 이용하며 이동 시 환자에게 가운, 일반 마스크, 장갑)를 착용시킨다(AIII) [5, 30]. 반드시 필요한 경우가 아니라면 병원 간 이동은 제한한다(BIII) [30]. 불가피하게 전원 할 때는 반드시 환자의 상태에 대한 자세한 정보를 상대 의료 기관에 미리 제공하여야 한다. 환자가 이동할 때는 보호자는 동행하지 않고 의료진만 동행하는 것을 원칙으로 하되, 의심 및 확진 환자가 보호자와 동행하는 경우 보호자에게도 의료진과 같은 수준의 개인 보호구를 착용시킨다. 환자 진료 및 입원 절차는 간소화하고 독립된 형태로 진행한다.

**Table 3.** 의료기관 시설 환기 기준의 근거(CDC 가이드라인 인용 [28])

| Air changes per hour | Minutes required for removal efficiency |       |
|----------------------|-----------------------------------------|-------|
|                      | 99%                                     | 99.9% |
| 2                    | 138                                     | 207   |
| 4                    | 69                                      | 104   |
| 6                    | 46                                      | 69    |
| 12                   | 23                                      | 35    |
| 15                   | 18                                      | 28    |
| 20                   | 14                                      | 21    |
| 50                   | 6                                       | 8     |
| 400                  | <1                                      | 1     |

**2. 메르스 환자 정의 및 접촉자 관리**

|                                                                                                                   |
|-------------------------------------------------------------------------------------------------------------------|
| <p><b>핵심 권고안</b></p> <p>1. 메르스 코로나바이러스 감염 확진 환자의 접촉자가 발열 또는 호흡기 증상이 있다면 PCR 검사를 시행해야 하며, 입원 격리 치료를 권한다(AIII).</p> |
|-------------------------------------------------------------------------------------------------------------------|

**Table 4.** 메르스 환자의 사례정의

|                                                                                                                                                                                                                                                                                                                                                                                                                                                                                                                       |
|-----------------------------------------------------------------------------------------------------------------------------------------------------------------------------------------------------------------------------------------------------------------------------------------------------------------------------------------------------------------------------------------------------------------------------------------------------------------------------------------------------------------------|
| <p><b>확진 환자</b></p> <p>실험실 진단검사를 통해 메르스 코로나바이러스 감염이 확인된 자</p> <p><b>의심 환자</b></p> <p>1. 발열이 동반된 호흡기 증상(기침, 호흡곤란 등) 또는 폐렴(임상적 또는 방사선학적 진단)이 있으면서<br/>                 - 증상이 나타나기 전 14일 이내에 중동지역<sup>a</sup>을 방문한 자 또는<br/>                 - 중동지역<sup>a</sup>을 방문한 후 14일 이내에 발열과 급성호흡기 증상이 발생한 자와 밀접하게 접촉한 자<sup>b</sup></p> <p>2. 발열 또는 호흡기 증상(기침, 호흡곤란 등)이 있고, 14일 이내에 메르스 확진 환자가 증상이 있는 동안 밀접하게 접촉한 자<sup>b</sup></p> <p>3. 발열이 동반된 호흡기 증상 또는 폐렴이 있으면서 증상 14일 이내에 메르스가 유행한 의료기관에<sup>c</sup> 직원, 환자, 방문자로 있었던 자</p> |
|-----------------------------------------------------------------------------------------------------------------------------------------------------------------------------------------------------------------------------------------------------------------------------------------------------------------------------------------------------------------------------------------------------------------------------------------------------------------------------------------------------------------------|

<sup>a</sup>중동지역은 아라비아반도 및 그 인근 국가를 말함(바레인, 이라크, 이란, 이스라엘의 웨스트뱅크와 가자지구, 요르단, 쿠웨이트, 레바논, 오만, 카타르, 사우디아라비아, 시리아, 아랍 에미리트, 예멘).

<sup>b</sup>밀접접촉자: 적절한 개인보호구(가운, 장갑, 고효율 마스크, 고글 또는 안면보호구 등)를 착용하지 않은 상태에서 환자의 호흡기 분비물과 직접 접촉한 경우, 환자와 2미터 이내에 머문 경우, 같은 실내 공간에 머문 경우 등.

<sup>c</sup>동일한 의료기관에서 메르스 코로나바이러스 감염 확진 환자 2인 이상 발생.

2. 무증상 접촉자의 경우는 노출 위험도 평가에 따라서 자가격리 또는 능동감시를 권한다(AIII).
3. 메르스 코로나바이러스 감염 유행 국가를 방문한 경우에 발열과 호흡기 증상이 동시에 있거나 폐렴 소견이 있으면 의심환자로 간주해 입원 격리 치료를 하도록 한다(AIII).
4. 메르스 코로나바이러스 감염 유행 국가를 방문한 경우에 폐렴 소견이 없고, 발열 또는 호흡기 증상 중 한가지만 있는 환자는 PCR 검사를 시행하고 14일간 자가격리를 하도록 한다(AIII).

1) 메르스 환자 사례정의  
환자 사례정의에 해당하는 의심환자에 대해서 의료진은 적절한 보호장구를 착용한 상태에서 검체를 채취하고 즉시 격리 조치를 해야 한다(Table 4).

2) 메르스 코로나바이러스 감염 노출자의 위험도 평가 및 관리  
접촉형태, 환자군 특성, 접촉환경(공간의 크기, 위치 및 환기상태 등) 등을 고려해서 접촉자의 위험도 평가(risk assessment)를 하고, 위험 수준에 따라서 적절한 격리 또는 능동감시 조치를 취해야 한다. 입원 격리 환자 또는 접촉자는 보건복지부와 의료기관이 공동으로 관리를 하며, 자가격리 또는 능동감시 접촉자의 관리는 지역보건소가

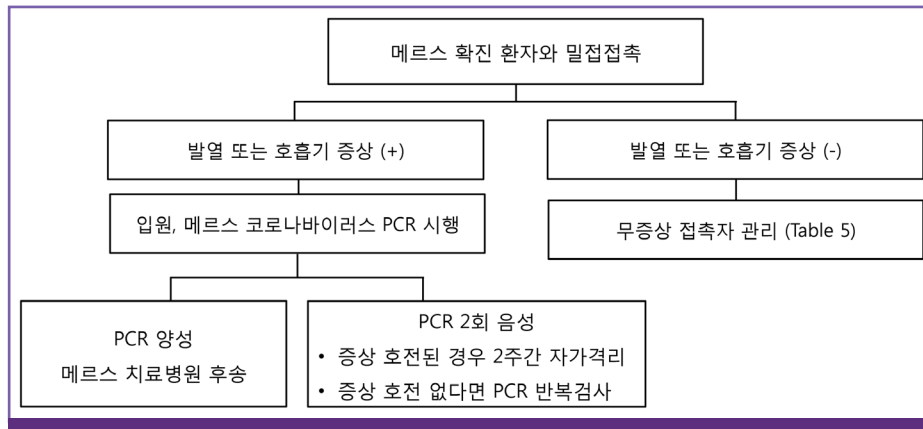

Figure 1. 메르스 코로나바이러스 감염 확진 환자의 밀접접촉자 관리.

Table 5. 메르스 무증상 접촉자의 위험도 평가 및 권고

| Risk classification                          | Disease status of the infection source (감염원의 질병상태) |                                              |                                           |
|----------------------------------------------|----------------------------------------------------|----------------------------------------------|-------------------------------------------|
|                                              | Asymptomatic (무증상)                                 | Symptomatic, without pneumonia (폐렴이 없는 유증상자) | Symptomatic, with pneumonia (폐렴이 있는 유증상자) |
| High-risk close contact (고위험 밀접접촉)           | Quarantine (격리)                                    | Quarantine (격리)                              | Quarantine (격리)                           |
| Intermediate-risk close contact (중등도위험 밀접접촉) | Contact surveillance (능동감시)                        | Quarantine (격리)                              | Quarantine (격리)                           |
| Casual contact (일시적 단순접촉)                    | No intervention (조치 필요 없음)                         | Contact surveillance (능동감시)                  | Contact surveillance (능동감시)               |

High-risk close contact: contact under the aerosol-generating procedure (eg. nebulizer, intubation, endotracheal suction, bronchoscopy, etc.). Intermediate-risk close contact: contact within 2 m distance from the laboratory-confirmed MERS patient or stay at the same ward/floor of hospital exposed to laboratory-confirmed MERS patients. Casual contact: instant contact with >2 m distance from the laboratory-confirmed MERS patients

Table 6. 증상 유무에 따른 메르스 유행 중동국가 또는 유행 의료기관<sup>a</sup> 방문자의 관리

| 발열 | 호흡기 증상 | 평가       | 계획                                                 |
|----|--------|----------|----------------------------------------------------|
| +  | +      | 메르스 의심환자 | PCR 검사 시행, 입원                                      |
| +  | -      | 주의 관찰 대상 | PCR 검사 시행, 귀가조치 및 마지막 노출로부터 14일간 자가격리 <sup>b</sup> |
| -  | +      | 주의 관찰 대상 | PCR 검사 시행, 귀가조치 및 마지막 노출로부터 14일간 자가격리 <sup>b</sup> |
| -  | -      | 특이소견 없음  | 특별한 조치 필요 없음                                       |

<sup>a</sup>메르스 유행 의료기관: 동일한 의료기관에서 메르스 코로나바이러스 감염 확진 환자 2인 이상 발생

<sup>b</sup>폐렴이 있는 경우는 메르스 의심환자로 분류하고 입원 격리 치료

담당한다.

메르스 코로나바이러스 감염 확진 환자의 접촉자가 발열 또는 호흡기 증상이 있다면 PCR 검사를 시행해야 하며, 입원 격리 치료를 권한다(AIII) (Fig. 1). 무증상 접촉자의 경우는 노출 위험도 평가에 따라서 자가격리 또는 능동감시를 권한다(AIII) (Table 5). 확진 환자와 직접 접촉은 없었지만 메르스 코로나바이러스 감염 유행하는 중등국가 방문한 경우에 발열과 호흡기 증상이 동시에 있거나 폐렴 소견이 있으면 의심환자로 간주해 입원 격리 치료를 하도록 한다(AIII) (Table 6). 폐렴 소견이 없고, 발열 또는 호흡기 증상 중 한가지만 있는 환자는 메르스 코로나바이러스 PCR 검사를 시행하고 14일간 자가격리를 하도록 한다(AIII). PCR 검사가 2회 음성으로 나온 경우에도 14일간 자가격리를 유지해야 한다. PCR 검사가 양성으로 나온 경우에는 메르스 코로나바이러스 감염 환자와 동일하게 처리하도록 한다.

능동감시는 메르스 확진/의심 환자에 대한 노출 정도가 적어 일상 생활을 유지하도록 하지만 증상유무를 정기적으로 모니터링 하는 조치를 의미하며, 자가격리는 메르스 확진/의심 환자와 2 m 이내 근거리 접촉을 하거나 실내 공간에서 함께 머물러서 감염의 우려가 크기 때문에 독립된 공간에 격리하는 조치를 말한다.

### 3. 손위생 및 개인보호구

| 핵심 권고안                                                                                                      |
|-------------------------------------------------------------------------------------------------------------|
| 1. 표준, 접촉 및 비말 주의(standard, contact & droplet precaution)를 기반으로 체계적인 감염 관리를 시행한다(AIII).                     |
| 2. 손위생은 환자 접촉 전후에 시행하며, 환자의 혈액, 체액, 분비물, 배설물, 기타 오염물질과 접촉하였거나 환자의 주변환경 접촉 후 그리고, 개인보호구 착용 전과 후에 시행한다(AIII). |
| 3. 메르스 의심 또는 확진 환자에게 에어로졸이 발생하는 상황에서는 표준주의, 접촉주의와 공기주의 조치를 적용한다(AI).                                        |
| 4. 의료진은 의심 및 확진 환자 접촉 시 장갑, 가운(전신보호복), 고효율마스크, 고글이나 안면가리개를 올바른 순서와 방법에 따라 착용하고 탈의한다(AII).                   |
| 5. 의심 또는 확진 환자는 호흡기분비물의 비말노출 및 접촉을 통한 노출을 최소화할 수 있도록 별도의 동선을 이용하며 이 동시 환자에게 일반 마스크, 가운, 장갑을 착용시킨다(AIII).    |

#### 1) 손위생

손위생은 환자 접촉 전후에 시행하며, 환자의 혈액, 체액, 분비물, 배설물, 기타 오염물질과 접촉하였거나 환자의 주변환경 접촉 후 그리고, 개인보호구 착용 전과 후에 시행한다(AIII). 눈에 보이는 오염물질이 묻은 경우 반드시 물과 비누를 이용하여 손 위생을 시행하며, 눈에 보이는 오염물질이 없다면 알코올 손소독제를 이용하여 20-30초간 손위생을 시행한다. 물 없이 사용하는 손소독제는 모든 표면을 다 닦을 수 있도록 충분한 양을 사용해야 하며 손의 모든 표면이 마를 때까지 문지른다. 물과 비누를 이용하여 손을 씻을 경우 물에 손을 적신 후

모든 표면에 비누가 접촉하도록 문지른 후 물로 행구고 일회용 타올로 건조시킨다(40-60초 소요). 의료기관은 손 위생을 위한 시설과 물품을 제공한다.

#### 2) 개인보호구

의료진은 의심 또는 확진 환자 접촉 시 장갑, 가운(전신보호복), 고효율마스크, 고글이나 안면가리개를 올바른 순서와 방법에 따라 착용한다(AII). 메르스 바이러스에 노출을 예방하기 위하여 메르스 확진 환자 및 의심 환자와 가까운 거리에서 접근하여 진료, 간호, 검사 등의 의료 행위뿐 아니라 이송, 청소, 배식 등을 할 때에 모든 직원은 개인보호구를 착용해야 한다. 올바른 순서와 방법의 준수함으로써, 개인보호구를 입는 중이나 벗는 과정에서 오염을 예방할 수 있다[31, 32]. 개인보호구는 일회용으로 사용하거나 재사용하는 경우 제조회사의 권고대로 세척과 소독해야 한다[11, 32]. 보호구 착용이 필요한 모든 직원은 상황별 착용해야 하는 보호구의 종류와 보호구 착용 순서 및 방법에 대하여 반드시 교육을 받고 숙련이 될 수 있도록 연습이 필요하다[11, 31, 32].

장갑은 손의 오염 예방 및 손상된 피부를 통한 바이러스 침투를 예방하기 위하여 착용한다[32, 33]. 진료나 간호 행위, 소독, 청소 행위 시 손상이 발생하거나 벗겨지지 않도록 견고하고 고정될 수 있는 재질과 형태를 갖추어야 한다. 필요시 이중으로 착용할 수 있으며, 재사용은 금해야 한다[32]. 직원 보호용 장갑은 멸균을 요구하지 않으나, 침습적 시술 등 무균술이 요구되는 행위 시에는 멸균 장갑을 착용하도록 한다[11, 32]. 한 환자에게 오염 행위 후 청결 행위를 할 경우에는 장갑을 벗고 손위생 수행이 필요하나 의료진의 노출이 우려되는 경우는 청결행위, 오염행위 순서로 업무를 변경하거나 이중 장갑을 착용하여 겹장갑을 교환하도록 한다.

가운은 방수재질의 가운 착용이 원칙이며, 환자와의 접촉 정도, 비말 또는 체액의 노출 정도에 따라 형태와 재질을 고려한다[11, 31, 34, 35]. 출입구에서 발열측정 직원의 경우 개방된 공간에서 짧은 시간 접촉하므로 격리용 가운 형태가 가능하나, 호흡기증상이 있는 환자 병실에 출입하는 경우 목, 하체 부분의 노출이 우려되므로 전신보호복 형태의 가운 착용이 필요하다. 전신보호복은 모자가 달려있는 상하의 원피스 형태의 보호복이며, 발을 보호하기 위한 덧신을 포함한다. 호흡기 분비물 배출, 설사 증상동반 또는 다른 체액 유출이 있는 경우 방수 앞치마를 추가로 착용하거나 가운의 재질이 보다 견고한 것으로 선택한다.

호흡기 보호구에는 고효율 마스크와 전동식 호흡장치(Powered Air Purifying Respirator, PAPR)가 있다. 공기매개 감염질환 노출을 예방하기 위해서는 고효율 마스크를 안면과 잘 밀착되도록 착용하여야 한다[32]. 고효율마스크와 동급 수준인 FFP2, KF94 마스크도 가능하다. 격리 병실을 나온 후 벗고 폐기하며, 외래 진료나 개방된 공간에서의 착용 시는 젖거나 표면이 오염된 경우 교환하여야 한다[11, 15, 31, 32, 34, 35]. 착용법 및 밀착도 검사(fitting test)에 대해 교육하고 올바른 착용 여부를 확인한다[32, 33]. 인공호흡기를 적용하는 환자의

경우 병실 내 바이러스 오염 정도가 매우 높을 수 있으므로 병실 출입 의료진의 경우 노출의 위험이 매우 높다. 고효율 마스크의 경우 의료 행위 중 움직임과 땀 분비 등으로 밀착 상태를 확신할 수 없으며, 장시간의 착용 시는 호흡이 불편할 수 있으므로 PAPR 사용을 권장한다. PAPR 착용과 관리에 대하여 교육하고 올바른 착용 여부를 확인한다.

고글은 눈을 보호하기 위해 착용하며, 오염물이 튀는 정도에 따라 형태를 선택한다. 렌즈 옆면이 얼굴과 밀착되도록 만들어진 고글의 경우 어떤 방향에서 호흡기 분비물이나 체액, 혈액이 튀어도 보호가 될 수 있다[32, 33]. 그러나 습기가 발생하므로 김서림 방지기능이 있어야 한다. 개방된 형태의 경우 눈이 충분히 보호가 되는지 검토하여야 한다. 가능한 일회용을 사용하며 재사용 시 충분한 소독과정을 거쳐야 한다[11]. 안면보호구는 호흡기 분비물 및 혈액, 체액이 튀었을 때 눈을 포함한 얼굴 피부를 보호하기 위하여 착용한다[32, 33]. 안면보호구는 턱부터 머리 앞부분까지 가능한 넓게 보호할 수 있는 형태가 좋다[11]. 가능한 일회용을 사용하며 재사용 시 충분한 소독과정을 거쳐야 한다[5-7].

3) 개인보호구 착탈의법

의심 또는 확진 환자 접촉 시 장갑, 전신보호복, 고효율마스크, 고글이나 안면가리개를 올바른 순서와 방법에 따라 착용하고 탈의해야 한다(AII) (Table 7, 8). 또한, 상황별로 적절한 보호구를 착용해야 한다(Table 9). 개인보호구는 병실 안에서 착용해서는 안 되며, 별도로 준비된 공간(전실)에서 완벽히 착용해야 한다(Fig. 2). 입실 전 개인보호구 착용상태에 대해서 거울을 이용해 직접 확인 하거나 다른 관찰자의 확인을 받아야 한다. 개인보호구 탈의 후 외부인에게 노출되지 않도록 적절히 수거해야 한다.

4) 에어로졸 발생상황

에어로졸 발생은 기관지 내시경 검사, 객담 유도(sputum induction), 기관삽관, 심폐 소생술, 개방된 객담 흡입(open suctioning of airways), 네블라이저(nebulizer) 등의 처치 과정에서 가능하다. 응급실 방문시 임상역학적으로 메르스 감염이 의심되는 환자(의료기관 방문력, 여행력 등)는 네블라이저 치료를 금하고, 반드시 필요한 경우는 격리실에서 시행한다. 에어로졸 발생 시술은 해파필터가 설치된 음압격리

Table 7. 개인보호구 착용순서(HICPAC 가이드라인 인용 [35])

|   |                                                                                                        |                                                                                      |  |
|---|--------------------------------------------------------------------------------------------------------|--------------------------------------------------------------------------------------|--|
| 1 | 손위생을 시행한다.                                                                                             |                                                                                      |  |
| 2 | 가운을 착용한다.                                                                                              |  |  |
| 3 | 고효율마스크(고효율 마스크)를 착용한다.<br>- 손가락으로 마스크의 코 접촉 부위를 눌러 밀착시킨다.<br>- 양손으로 마스크를 움켜쥐고 흡입/배기하면서 새는 곳이 없는지 확인한다. |  |  |
| 4 | 눈 보호구(고글이나 안면보호대)를 착용한다.                                                                               |  |  |
| 5 | 장갑을 착용하고 장갑은 옷소매 위를 덮도록 주의한다(경우에 따라 장갑을 한 벌 더 착용할 수 있다).                                               |  |  |

**Table 8.** 개인보호구 탈의순서(HICPAC 가이드라인 인용 [35])

|                                                                                                  |                                                                                      |
|--------------------------------------------------------------------------------------------------|--------------------------------------------------------------------------------------|
| <p>1 장갑은 한 손으로 반대편 장갑을 벗겨 손에 쥐고 장갑이 벗겨진 손으로 남은 장갑을 조심스럽게 벗겨 말아서 버린 후 손위생을 시행한다.</p>              | 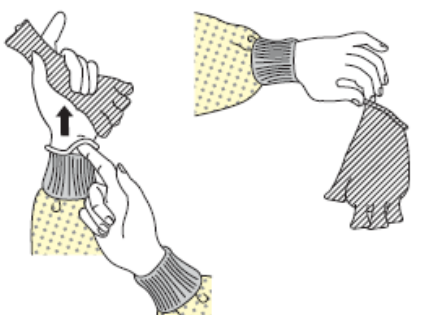   |
| <p>2 가운의 환자 접촉 부위를 안으로 말아주면서 신체에 오염되지 않도록 주의하여 탈의한다(가운과 장갑을 함께 제거할 수 있다. 가장 오염된 것을 먼저 제거한다).</p> |   |
| <p>3 고글 혹은 안면보호대를 앞면을 만지지 않고 제거한다.</p>                                                           |  |
| <p>4 앞면을 만지지 않고 끈을 잡고 고효율마스크를 제거한다.</p>                                                          |  |
| <p>5 모든 보호구를 제거한 후 바로 손위생을 시행한다.</p>                                                             |                                                                                      |

실에서 시행하는 것을 원칙으로 하며 부득이한 경우 외부와 환기가 잘 되면서 전체 공조와 독립된 공간에서 시행할 수 있도록 병원 시설 팀의 협조를 구한다.

에어로졸 발생 시술에 참여하는 의료진은 전신보호복, 고효율 마스크, 장갑, 모자, 고글 혹은 안면보호구를 착용해야 한다. 호흡기 보호구는 가능하면 고효율 마스크대신 PAPR를 사용하도록 한다. 에어로졸 발생 시술을 시행할 경우 문을 반드시 닫아야 하며, 꼭 필요한 출입 외에는 문을 열지 않도록 해야 한다. 에어로졸 발생 시술을 시행한 뒤에는 개인보호장비를 착용하지 않은 의료진은 공기 중 에어로졸이 충분히 외부로 배출된 이후 방을 이용할 수 있으며(시간당 12회 공기 순환을 기준으로 30분 이상 경과 후에는 1% 미만의 공기남게

되어 사용 가능) (Table 3) [28], 주위 및 바닥 표면은 소독해야 한다(환경 소독 지침을 따른다).

5) 환자의 이송

의심 또는 확진 환자는 호흡기분비물의 비말노출 및 접촉을 통한 노출을 최소화할 수 있도록 별도의 동선을 이용하며, 기관내 이동시 환자에게 일반 마스크, 가운, 장갑을 착용시킨다(AIII). 이동 경로는 미리 통제를 하거나 통행이 많지 않은 경로를 이용하여 이동한다. 이동 시는 의료진이 동행하며 동행하는 의료진은 고효율 마스크와 가운, 장갑을 착용하며 환자를 가능한 직접 접촉하지 않도록 한다. 이동할 부서에 미리 정보를 주어 주의사항을 준비하고 환자를 받을 수 있



Table 9. 상황별 보호구 착용

|                 | 장갑 | 고효율 마스크         | 전동식 호흡장치        | 가운 | 전신보호복(덧신포함) | 고글 또는 안면보호구 |
|-----------------|----|-----------------|-----------------|----|-------------|-------------|
| 선별데스크           | 착용 | 착용              |                 | 착용 |             |             |
| 환자접수/안내(격리진료소)  | 착용 | 착용              |                 | 착용 |             |             |
| 환자진료, 간호(격리진료소) | 착용 | 착용              |                 |    | 착용          | 착용          |
| 병실 출입(진료, 간호 등) | 착용 | 착용              |                 |    | 착용          | 착용          |
| 에어로졸 발생 시술      | 착용 |                 | 착용              |    | 착용          | 착용          |
| 호흡기 검체 채취       | 착용 | 착용 <sup>a</sup> | 착용 <sup>a</sup> |    | 착용          | 착용          |
| 호흡기 검체 검사       | 착용 | 착용              |                 |    | 착용          | 착용          |
| 기구 세척, 소독       | 착용 | 착용              |                 | 착용 |             | 착용          |
| 병실 청소, 소독       | 착용 | 착용              |                 |    | 착용          | 착용          |
| 구급차 이송          | 착용 | 착용              |                 |    | 착용          | 필요시         |

<sup>a</sup>일반적으로 고효율 마스크를 착용하며, 인공호흡기 환자의 경우 전동식 호흡장치(powered air purifying respirator) 착용한다.

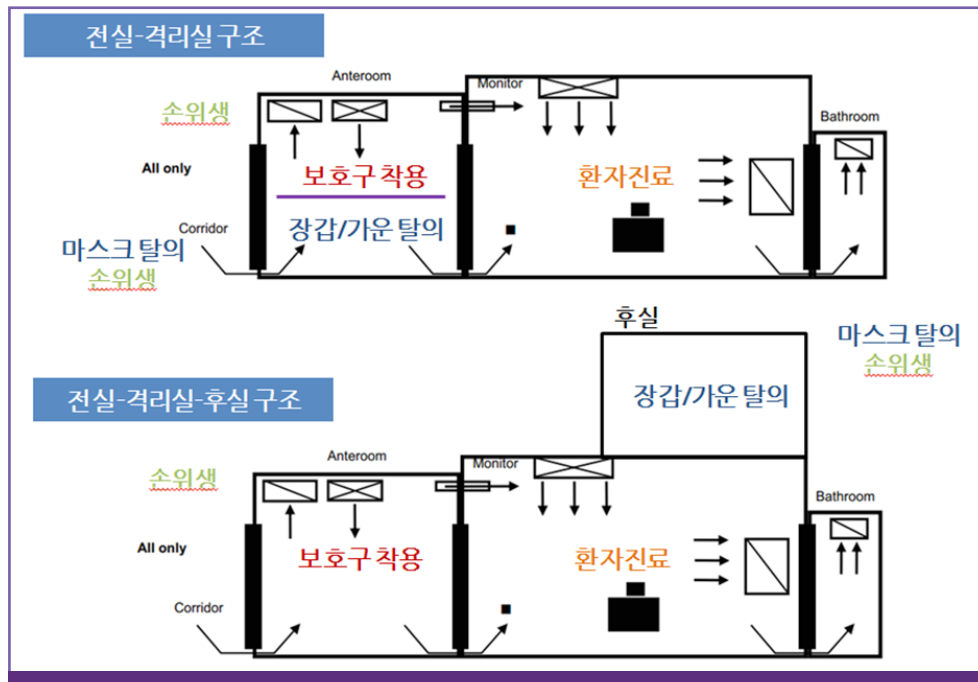

Figure 2. 전실구조에 따른 보호구 착용의 모식도.

도록 한다.

타기관 이송은 관할 보건소와 협의하여 보건소 구급차 또는 119 지원 구급차를 이용하도록 한다. 이송을 할 병원에 미리 환자 정보를 제공하고 출발 시간을 협의하여 환자를 받는 의료기관이 준비를 할 수 있도록 한다. 환자와 같은 공간에 탑승하는 운전자나 이송요원은 폐쇄된 공간에 환자와 함께 있게 되므로 고효율마스크, 전신보호복, 장갑을 착용한다. 환자가 마스크를 착용하지 못하는 상황에서(예: 산소투여 등) 환자와 가까이(1 m 내) 탑승하는 경우 고글을 추가로 착용한다.

#### 4. 검사실 관리

##### 핵심 권고안

1. 각종 검사에 관련된 의료진은 감염관리 교육을 사전에 받아야 하며, 개인보호구 착용 및 개인 위생 수칙을 철저히 지켜야 한다(BIII).
2. 영상 검사는 가능한 이동식 촬영기기를 이용하여 격리실 내에서 시행하도록 하며, 부득이하게 촬영실로 이송이 필요한 경우 감염 전파를 방지할 수 있는 안전한 이송 방법과 경로를 이용한다(BIII).
3. 감염성 검체는 적절한 용기를 사용하여 3중 포장을 실시하여 인편으로 검사실로 운송하며, 검체가 출발하기 전 미리 검사실에 연락한다(BIII).

1) 영상검사

영상검사는 반드시 감염관리, 개인정보취급 주의/탈의에 대해 충분한 교육을 받은 의료진이 시행하여야 한다(BIII). 전파 가능성이 있는 환자의 병원 내 이동을 최소화하기 위해 영상검사는 가능한 이동식 촬영기기를 이용하여 환자가 있는 격리실 내에서 시행한다(BIII).

이동식 촬영기기를 이용한 영상검사를 시행하는 의료진은 손위생과 개인정보취급(전신보호복, 일회용 장갑, 고효율 마스크, 고글 혹은 안면보호구)를 착용하고 검사를 시행한다(BIII). 검사 시행 전후 환자 진료와 동일하게 개인정보취급 주의/탈의해야 한다(BIII). 촬영을 마친 후 이동식 촬영기기는 환자와 접촉한 부위를 중심으로 아래에 제시된 소독 및 청소지침에 따라 소독한다(BIII).

CT, MRI 등과 같이 환자를 이동시켜 진행하는 영상검사의 경우에 자세한 내용은 환자 이송 관련 지침에 따라 시행한다(BIII). 환자를 이송하는 의료진은 검사 전후 손위생, 개인정보취급(전신보호복, 일회용 장갑, 고효율마스크, 고글 혹은 안면보호구) 주의/탈의를 지침에 따라 시행한다(BIII). 촬영실에서도 영상 검사를 시행한 이후 의료기기의 소독 및 검사실 환경의 소독/청소를 지침에 따라 시행한다(BIII).

2) 검체 채취, 포장 및 운송

검체 채취는 반드시 감염관리, 개인정보취급 주의/탈의에 대해 충분한 교육을 받은 의료진이 시행하여야 한다(BIII). 검체를 채취하는 의료진은 손위생과 개인정보취급(전신보호복, 일회용 장갑, 고효율 마스크, 고글 혹은 안면보호구)를 착용하고 검사를 시행한다. 검사 시행 전후 환자 진료와 동일한 순서로 개인정보취급 주의/탈의한다(BIII). 하기도 검체 채취 중에는 에어로졸 발생 가능성이 있으므로 에어로졸 생성 시술 감염관리 지침을 따른다.

의료기관 내에서 검체를 포장 운송하는 경우에는 2중 포장을 한다(Fig. 3). 1차 용기(검체통)는 나사마개로 밀봉이 되고 파손 위험이 적은 플라스틱 재질이어야 한다(BIII). 1차 용기(검체통) 표면을 70% 알코올 솜으로 닦아서 오염을 제거하고 지퍼백에 담고 2차 용기에 포장해서 운송한다(BIII). 검체를 외부 운송하는 경우에는 3중 포장을 해야 한다(Fig. 3). 1차 용기(검체통) 표면을 70% 알코올 솜으로 닦아서 오염물질을 제거한다. 흡수제와 함께 지퍼백에 담고 2차 용기에 넣은 후, 검체가 2차 용기 안에서 넘어지거나 굴러 다니지 않도록 고정하고 뚜껑을 잘 닫는다. 검체 관련 정보 기입지(검체시험 의뢰서)를 3차 용기 안에 넣은 후 포장한다.

감염성 검체(호흡기 검체)는 검사실에 미리 알리고 보내야 하며(검체에 '메르스 코로나바이러스 의심' 라벨을 부착), 검체는 인원으로 운송해야 한다. 운송 요원은 엽지름 사고처리에 대한 교육을 받아야 하고, 운송 중 처리 키트를 지참한다.

5. 환자 관리

|                                     |
|-------------------------------------|
| 핵심 권고안                              |
| 1. 확진 또는 의심환자는 개별화장실이 있는 음압 1인실에 배치 |

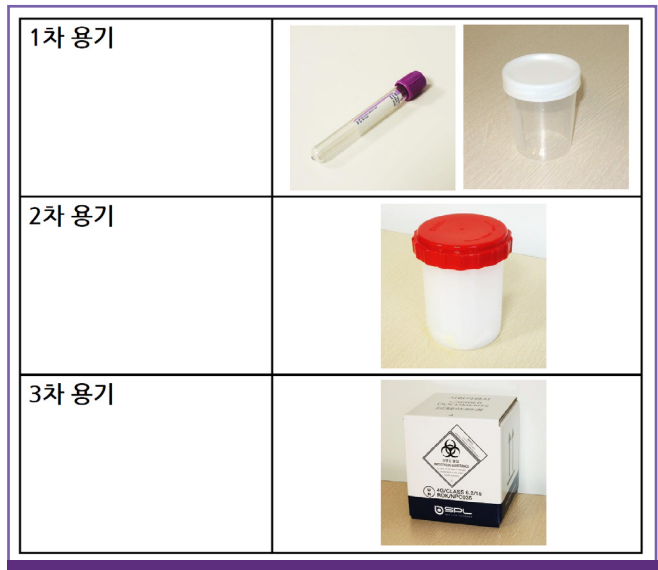

Figure 3. 검체의 포장.

- 한다(AIII).
- 1인실 배치가 어려운 경우에는 노출원이 같았던 확진 환자들끼리만 동일병실에 코호트격리를 한다(BIII).
  - 의심환자는 반드시 1인실 격리를 한다(AIII).

1) 외래 및 응급실 환자 관리

메르스 의심환자 진료시에 다른 환자와 동선이 겹치지 않게 주의하고, 외래 및 응급실의 격리구역은 다른 구역과 공기가 섞이지 않게 해야 한다. 메르스 의심환자 진료시에는 진료공간에서 방사선 촬영과 실험실 검사 등이 모두 이루어 지도록 준비하도록 한다.

의심환자 입원시에는 별도의 이동경로(엘리베이터 포함)를 이용하여 의료진 동반 하에 이송한다.

2) 입원 환자 관리

확진 또는 의심환자는 개별화장실이 있는 음압 1인실에 배치한다(AIII). 입원치료 중인 사람은 입원치료기간 동안 병실 이탈 및 이동을 금지한다. 입원치료 중인 사람의 혈액, 체액, 분비물, 배설물 등은 타인에게 노출되지 않도록 철저히 관리하고 오염된 물품은 소독 혹은 폐기해야 한다. 환자의 진료에 사용되는 기구는 가능한 일회용 기구를 사용하고 폐기하며, 일회용이 아닌 물품(예, 체온계, 청진기 등)은 환자 전용으로 사용한다. 환자의 식사는 일회용 식기를 사용하여 외부에서 공급하고, 남은 음식물은 의료폐기물과 함께 폐기한다. 출입문에 접촉 및 비말주의를 표시하는 안내문을 부착한다. 에어로졸이 발생하는 시술(예, 네블라이저, 유도객담채취)은 공기주의를 준수한다. 입원실에는 알코올 손소독제, 손위생을 위한 개수대, 손위생 제제, 소모품을 버리기 위한 폐기물 통을 비치한다.

3) 코호트 격리

확진자가 발생한 병원중 자체 감염관리 능력이 제한적인 중증병원에서만 1차적으로 적용한다. 1인실 배치가 어려운 경우에 노출원이 같았던 확진 환자들끼리만 동일병실에 코호트격리를 한다(BIII). 그러나, 의심환자는 반드시 1인실 격리를 한다(AIII).

코호트 구역은 환자가 발생한 구역을 기본으로 하며, 환자의 동선, 공조 시스템, 진료현황 등을 고려하여 최소 병실 혹은 병동 단위로 설정한다. 환자들의 퇴원 혹은 자택 격리는 원칙적으로 금하며, 격리 병동으로 추가적인 환자 입원 및 관계자 외 출입을 금한다. 관찰 기간 동안 검사등을 위한 병동 외 이동은 최소화하며, 불가피한 경우 병동 외로 이동 시 개인보호구를 착용한다. 호흡기 증상이 있는 의심 환자는 검사를 의뢰하고, 결과 판정까지 병동 내 1인실에 격리한다.

코호트 병동 전담 의료진을 확보해야 한다. 전담 의료진 및 직원은 반드시 개인보호구를 착용 후 환자를 진료하며, 격리 병동 외 환자 진료는 금지한다. 호흡기 증상이 발생하면 의료진이나 직원도 1인실 격리하고 검사를 시행한다.

4) 특수 상황 관리

인공호흡기 치료 환자의 기도 삽관 및 제거는 음압이 설치된 격리실에서 시행해야 한다. 기도 삽관 시술 후 오염된 공기의 99%가 제거될 때까지 문을 열지 않는다(시간당 12회 공기 순환을 기준으로 30분 이상 경과 후에는 1% 미만의 공기만 남게 되어 사용 가능). 환자의 기도와 삽관 튜브 사이에 일회용 고효율 항균 필터를 장착한 인공호흡기를 사용하도록 한다. 소모되는 물품들은 가급적 일회용 물품을 사용하고, 폐쇄된 흡입 시스템(closed suction system)을 사용해야 한다. 안면 양압호흡기계(non-invasive positive-pressure ventilation with face mask)의 사용은 감염 전파의 위험을 증가시킬 수 있으므로 금한다. 인공 호흡기 치료 환자의 진료, 검사에 참여하는 의료진은 손위생을 철저히 하고, 개인보호구(전신보호복, 일회용 장갑, 고글 혹은 안면보호구, PAPR 등)를 바르게 착용해야 한다.

에크모 치료 환자의 진료와 검사에 참여하는 의료진은 손위생을 철저히 하고, 개인보호구(전신보호복, 일회용 장갑, 고글 혹은 안면보호구, 고효율마스크)를 바르게 착용해야 한다. 에크모 시술 시에는 멸균된 일회용 수술 가운을 입기 전에 에어로졸 발생 시술에 준하여 고효율마스크 대신 PAPR을 사용할 수 있다. 혈관카테터 사용과 관련된 세균, 진균 감염 발생을 예방하기 위해 적절한 무균 시술을 통해 카테

터를 삽입하고 삽입 후 감염 발생 여부를 모니터 해야 한다.

5) 방문객 관리

병원의 모든 방문객은 방문일지에 출입기록을 한다. 확진 및 의심 환자의 면회는 원칙적으로 제한한다. 불가피하게 격리실 출입이 필요한 경우 적절한 개인보호구를 착용하도록 한다. 방문객은 올바른 개인보호구 사용방법과 손위생에 대한 교육을 받아야 한다. 급성호흡기감염증상이 있는 사람은 방문을 제한한다.

6. 혈액투석 환자의 관리

| 핵심 권고안                                                                               |
|--------------------------------------------------------------------------------------|
| 1. 메르스 확진/의심 환자는 음압이 유지되는 독립된 1인실 격리공간에서 이동식 투석기로 투석을 시행한다(AIII).                    |
| 2. 메르스 확진/의심 환자의 투석 시 표준주의와 접촉주의, 비말주의를 준수하며, 에어로졸이 발생할 수 있는 상황에서는 공기주의를 준수한다(AIII). |

1) 투석실에서 메르스 의심/확진 환자 발생시 필요한 신속대응조치  
 노출 초기에 신속하게 환자를 격리하고, 노출된 환자의 위험도를 평가해야 한다(Table 10). 감염관리실이 있는 종합병원의 투석실에서는 메르스 의심 또는 확진 환자에게 수술용 마스크를 씌우고 격리실에 머무르게 한 후에, 감염관리실에 연락한다. 감염관리실이 없는 병원의 소규모 투석실의 경우는 메르스 의심 또는 확진 환자에게 수술용 마스크를 씌우고 별도의 공간에 머무르게 한 후에, 지역 보건소에 연락을 한다.

2) 메르스 확진/의심 환자의 혈액투석 원칙

메르스 확진/의심 환자는 음압이 유지되는 독립된 1인실 격리공간에서 이동식 투석기로 투석을 시행해야 한다(AIII). 증상이 완전히 호전되고, 유전자 검사 2회 연속 음전이 확인될 때까지 격리 투석을 유지해야 한다. 메르스 확진/의심 환자의 투석 시 표준주의와 접촉주의, 비말주의를 준수하며, 에어로졸이 발생할 수 있는 상황에서는 공기주의를 준수한다(AIII).

Table 10. 투석실에서 메르스 의심/확진 환자 발생시 노출자의 위험도 평가

|                                                      |
|------------------------------------------------------|
| 고위험군(밀접접촉자)                                          |
| 1. 메르스 확진/의심 환자와 같은 장소에서 동일시간에 투석을 받은 경우             |
| 2. 메르스 확진/의심 환자와 2 m 이내의 근거리에서 직접 또는 간접적인 접촉을 한 경우   |
| 3. 메르스 확진/의심 환자가 투석을 받은 침대에서 적절한 소독 없이 이어서 투석을 받은 경우 |
| 저위험군(단순접촉자)                                          |
| 1. 메르스 확진/의심 환자와 같은 날짜이지만 다른 시간, 다른 침대에서 투석을 받은 경우   |
| 2. 메르스 확진/의심 환자와 다른 날짜에 투석을 받은 경우                    |

3) 무증상 접촉자의 투석 원칙

발열이나 호흡기 증상이 없는 고위험군(밀접접촉자)은 노출 후 14일간 1인실 격리 입원을 하거나 자가격리를 한다. 자가격리를 하는 경우에 대중교통 이용을 금하며, 보건소에서 제공하는 교통편을 이용하고, 통제된 동선을 따라서 투석실로 이동한다. 1인실 격리공간에서 이동식 투석기로 투석을 시행해야 하며, 1인실 격리 투석이 불가능한 경우는 저위험군의 투석이 끝난 후에 투석을 하고 철저히 소독해야 한다.

발열이나 호흡기 증상이 없는 저위험군(단순접촉자)은 노출 후 14일간 증상 발생에 대한 능동감시를 한다. 발열과 호흡기 증상 발생 여부를 병원 입구 별도의 공간에서 매일 체크하고 투석실 출입을 허가한다. 투석 중에도 발열과 호흡기 증상 발생 여부를 매일 모니터하고 투석환자에서는 발열 기준을 낮게 적용하도록 한다(37.5°C). 다른 환자와 최소한 2m 이상의 간격을 유지하며 투석을 시행하도록 한다. 모든 환자는 코와 입을 완전히 가리도록 수술용 마스크를 착용하고, 투석을 하며 기침 에티켓을 준수하도록 교육한다. 기구나 장비는 환자 간에 사용시 적절한 방법으로 소독을 해야 하며, 매 환자 투석 후 투석기는 적절한 방법으로 철저히 소독한다. 만일, 투석 환자에서 발열 또는 호흡기 증상이 발생하면 즉시 격리하고, 메르스 검사를 시행한다.

7. 메르스 의심/확진 환자의 수술

| 핵심 권고안                                                                                  |
|-----------------------------------------------------------------------------------------|
| 1. 계획된 수술(elective surgery)은 가능한 연기하고, 응급 수술(emergency surgery)에 국한하여 시행한다(BIII).       |
| 2. 증상이 없는 노출자는 일반 환자에 준하여 일반적인 절차에 따라 수술을 시행한다(BII).                                    |
| 3. 공기 전파주의(airborne precaution)에 준한 음압 격리 수술실에서 수술을 시행한다(AIII).                         |
| 4. 환자는 마취 중 고효율 필터를 장착한 인공호흡기를 사용하며, 소모되는 물품들은 가급적 일회용 물품을 사용한다(BIII).                  |
| 5. 수술 종료 후 기도 삽관 제거와 회복은 격리실에서 시행한다(BII).                                               |
| 6. 기도 삽관 등 에어로졸 발생 시술에 참여하는 의료진은 개인보호구(가운, 고효율 마스크, 장갑, 모자, 고글 혹은 안면보호구)를 착용해야 한다(AII). |
| 7. 개인보호구를 착용하지 않은 의료진은 공기 중 에어로졸이 충분히 외부로 배출된 이후 해당 수술실을 이용할 수 있다(BII).                 |

1) 기본원칙

계획된 수술(elective surgery)은 가능한 연기하고, 응급 수술(emergency surgery)에 국한하여 시행한다(BIII). 의심 환자는 확진 검사를 이용하여 신속하게 감염 여부를 평가한 후 수술을 시행한다. 그러나, 의학적으로 매우 급한 응급 수술이 요구되고 확진 여부를 알 수

없다면 확진 환자라는 가정 하에 수술한다. 환자와 접촉하는 의료진 및 수술실에 머무르는 인원은 가능한 최소 인원으로 제한한다[27].

증상이 없는 노출자는 일반 환자에 준하여 일반적인 절차에 따라 수술을 시행한다(BII) [5].

2) 수술실 조건

결핵 등과 같이 공기 전파주의(airborne precaution)에 준한 음압 격리 수술실에서 시행한다(AIII) [29]. 층류 기류(laminar airflow)가 천정에서 수술 필드로 향하도록 하고, 벽의 모든 면에서 통풍관 공기통(air duct)으로 기류가 흡입되도록 하여, 수술 필드로부터 공기가 올라오지 않도록 한다. 수술 중 문은 반드시 닫아야 하며, 꼭 필요할 출입 외에는 문을 열지 않도록 주의한다.

환자는 마취 중 고효율 필터를 장착한 인공호흡기를 사용하며, 소모되는 물품들은 가급적 일회용 물품을 사용한다(BIII) [36].

3) 수술 절차

환자는 이송 원칙을 준수하여 수술실로 이동되며, 수술실에서 요구되는 기도 및 중심정맥 삽관을 실시한다. 기도 삽관 및 제거 시 의료진을 최대한 보호하기 위해 이동식 폐파필터를 설치하고, 실내 공기가 모두 폐파필터를 통과할 수 있도록 전문가 의견에 따라 적절한 장소에 설치한다. 기도 삽관 시술 후 오염된 공기의 99%가 제거될 때까지 문을 열지 않는다(시간 당 12회 공기 순환을 기준으로 30분 이후) [36]. 수술하는 동안에는 휴대용 폐파필터를 작동시키지 않는다.

전신 마취 시 환자의 기도와 마취 기도 삽관 튜브 사이에 일회용 고효율 항균 필터를 장착한 인공호흡기를 사용하며 소모되는 물품들은 가급적 일회용 물품을 사용하고, 마취 기구 및 실내 공기가 오염되는 것을 예방하기 위해 폐쇄된 흡입 시스템(closed suction system)을 사용한다[36].

수술 종료 후 기도 삽관 제거와 회복은 격리실에서 시행한다(BII) [29]. 하지만, 회복실에 격리실이 설치되어 있지 않다면 회복실을 경유하지 않고 이송 원칙에 따라 음압 병실로 이동한다.

4) 의료진 관리

기도 삽관 등 에어로졸 발생 시술에 참여하는 의료진은 개인보호구(가운, 동력식 공기정화 호흡기보호구[PAPR], 장갑, 모자, 고글 혹은 안면보호구)를 착용해야 한다(AII) [17]. 사용 가능하다면 고효율 마스크대신 동력식 공기정화 호흡기보호구를 사용할 수 있다(CIII) [37]. 수술에 직접 참여하지 않는 경우 및 수술부위 소독을 할 때는 수술실 출입 시 개인보호구(가운, 장갑, 고효율 마스크, 모자, 고글, 덧신)를 착용한다[17, 19]. 수술 부위 소독 후 장갑과 가운을 새로 갈아입은 후 수술을 시작한다.

5) 수술실 환경관리, 청소 및 소독

에어로졸 발생 시술을 시행한 뒤에는 개인보호구를 착용하지 않은 의료진은 공기 중 에어로졸이 충분히 외부로 배출된 이후 수술실을

이용할 수 있으며(시간당 12회 공기 순환을 기준으로 30분 이상 경과 후에는 1% 미만의 공기만 남게 되어 사용 가능) [28], 벽면과 바닥 표면은 지침에 따라 소독 및 청소를 해야 한다(BII) [38]. 특히, 수술실에서 기도 삽관을 제거하는 경우 기침으로 공기 중에 배출되는 균에 의한 전파를 최소화하기 위해 에어로졸 발생 시술에 준하여 관리한다(AII) [36].

호흡관련 기구 등을 포함하여 수술에 사용한 기구는 원칙을 준수해서 소독해야 한다. 수술 후 해당 수술실은 음압을 가동하여 최소 30분간 환기해야 하고, 환경 소독은 청소 및 환경관리 원칙에 따라 시행한다[28].

### 8. 직원 관리

| 핵심 권고안                                                                     |
|----------------------------------------------------------------------------|
| 1. 모든 직원은 감염관리 규칙을 준수하여야 하고, 메르스 감염에 대한 교육을 받아야 한다(AIII).                  |
| 2. 고위험 기저질환을 가진 구성원과 임신부를 제외한 직원들을 우선적으로 관련 근무에 배치한다(BII).                 |
| 3. 확진자에 노출된 직원에 대해서는 마지막 노출 후 14일 간 발열 및 호흡기 등의 관련 증상을 주의 깊게 관찰해야 한다(AII). |
| 4. 근무 중인 직원에 대해서는 하루 2회 이상 발열 및 호흡기 증상 발생 여부를 주기적으로 감시해야 한다(BII).          |
| 5. 발열 및 호흡기 증상이 발생한 의료진을 모니터링하고, 자가 보고하는 시스템을 구축하여 효율적으로 가동한다(AII).        |

모든 직원은 감염관리 규칙을 준수해야 하고, 메르스 감염에 대한 교육을 받아야 한다(AIII). 용역 업체 인력보다 전담 인력을 활용하며, 근무 직원의 숙련도 및 피로도 등을 감안하여 충분한 인력을 확보해야 한다.

당뇨병, 만성 폐질환, 고혈압을 제외한 만성 심장질환, 만성 신장질환, 만성 간질환 및 면역억제제를 복용하는 환자 등의 고위험 기저질환을 가진 직원과 임신부를 제외한 구성원들을 우선적으로 관련 근무에 배치한다(BII) [39, 40].

의심 및 확진 환자와 밀접 접촉을 하는 의료진의 명단과 노출일, 노출기간을 모두 기록하고, 공유해야 한다(AII) [41]. 확진자에 노출된 직원에 대해서는 마지막 노출 후 14일 간 발열 및 호흡기 등의 관련 증상을 주의 깊게 관찰해야 한다(AII) [3]. 또한, 근무 중인 직원에 대해서는 하루 2회 이상 발열 및 호흡기 증상 발생 여부를 주기적으로 감시해야 한다(BII) [42, 43]. 기침이나 발열이 있는 직원은 업무에 임하지 않는다. 증상이 발생한 직원은 진단, 치료 및 격리의 필요성에 대해 메르스 감염대책위원회에 조언을 구하고, 다른 직원과 접촉을 피한다[43]. 발열 및 호흡기 증상이 발생한 의료진을 모니터링하고, 자가 보고하는 시스템을 구축하여 효과적으로 가동한다(AII) [28].

응급실과 선별 진료소에서는 환자의 위험도 평가에 따른 분류를 하고, 방명록 작성을 관리할 수 있도록 충분한 인력을 배치해야 한다(BII) [16, 44].

### 9. 사망자 관리

| 핵심 권고안                                                                       |
|------------------------------------------------------------------------------|
| 1. 사망자에서는 높은 바이러스 배출이 가능하므로 시신을 밀봉, 소독하여 운반 및 처리함으로써 감염의 위험을 최소화해야 한다(AIII). |
| 2. 사체를 다루는 사람은 적절한 개인보호구를 착용한다(AIII).                                        |
| 3. 사체는 화장 처리한다(AIII).                                                        |

#### 1) 사망자 사후 준비

메르스 코로나바이러스 감염으로 인한 사망자에서는 높은 바이러스 배출이 가능하므로 시신을 밀봉, 소독하여 운반 및 처리함으로써 감염의 위험을 최소화 해야 한다(AIII). 메르스 코로나바이러스 감염 확진자일 경우, 유족과 협의된 시점에 개인보호구를 착용한 요원을 병실에 투입하여 시신 밀봉, 소독, 입관을 진행하고, 운구차량을 이용하여 화장시설로 이동한다. 메르스 코로나바이러스 감염이 의심되는 상태에서 확진을 못하고 사망한 경우에는 확진 환자에 준해서 사체를 처리한다. 한편, 진단을 위한 검체를 채취하여 확진 검사는 시행한다. 의심환자를 결정하기 어려운 경우에는 전문가 자문 하에 시행한다.

개인보호구를 갖춘 사후관리담당자는 시신 처리 지침에 따라 시신을 밀봉한다(AIII). 사망 병실에서 사체를 세척하거나, 닦거나, 탈의를 하지 않으며, 환자에게 침습적으로 사용된 관(정맥관, 기관지 내관 등)도 제거하지 않은 채로 사체백에 함께 넣어 외부 감염을 차단한다. 사체는 방수용 사체백에 넣고, 사체백 표면을 소독한 후에 또 다른 사체백에 처음의 사체백을 넣어 2중 밀봉한다. 사체백 표면을 소독하고 공기 건조하여 별도의 이송용 침대로 사체를 운구한다.

#### 2) 사체 운구

메르스 코로나바이러스 감염으로 인한 사망자를 다루는 영안실 직원과 장의사는 감염 전파 위험성을 알고 있어야 한다. 사체 안치소에 이동하기 전 사체백에 오염된 물질이 있으면 이를 제거하고 소독제로 살균한 다음 공기 건조하고 이동한다. 사체를 운구하는 자는 개인 보호구(고효율마스크, 장갑, 고글 또는 안면보호구, 보호복 등)를 착용해야 한다(AIII). 개인보호구를 착용하고 작업한 경우 작업 후 격리하지 않는다. 사체안치소 담당자는 반드시 개인보호구(고효율마스크 이상의 호흡기 보호장비, 전신보호복 또는 소매를 덮는 앞치마, 고글 또는 안면보호구, 신발덮개 또는 고무장화, 2중장갑(결장갑은 고무장갑)를 착용한다. 염과 방부처리 금하고 즉시 사체를 백체로 관에 넣고 밀폐하며, 화장하도록 한다. 사체는 가능한 운송을 최소화하고 부검은 가능한 시행하지 않는다. 시신이 있었던 병실, 영안실(입관), 안치실(보관), 운구차량(이송), 화장 시설을 모두 사후 소독한다.

## 10. 부검 관리

| 핵심 권고안                                        |
|-----------------------------------------------|
| 1. 부검이 필요한 경우에는 관계당국과 협의를 통해 시행여부를 결정한다(III). |
| 2. 부검은 적절한 환기가 되는 장소에서 시행한다(AII).             |
| 3. 부검실에서는 에어로졸 발생을 최소화한다(AIII).               |

메르스로 확진되거나 강력히 의심되는 경우에는 부검을 시행하지 않는 것을 원칙으로 하며, 필요시에는 질병관리본부 및 보건복지부 등 관계 당국과의 협의를 통해 시행여부를 결정해야 한다.

### 1) 부검실의 시설

부검은 적절한 환기가 되는 장소에서 시행해야 한다(AII) [45]. 구체적으로, 시간당 12회 이상 환기가 되는 음압시설, biosafety level 3를 충족해야 한다[45].

### 2) 부검실의 환경관리

부검실에서는 에어로졸 발생을 최소화 해야 한다(Table 11). 또한, 배기시스템을 작동하여 공기 중에 에어로졸의 양을 줄이고, 부검대 주변의 공기는 시술자에서 멀어지는 쪽으로 향하게 한다(천장에서 시술대쪽으로 향하고, 사면에서 음압으로 배출되도록 한다). 부검을 위한 사체는 방수용 사체백에 넣어 이송하며, 사체냉장고에 보관하고 부검환경이 안전하게 준비가 되면 부검을 시행한다. 부검자는 반드시 개인보호구(고효율마스크 이상의 호흡기 보호장비, 방수 전신 보호복, 고무 앞치마, 고글 또는 안면보호구, 무릎 높이의 고무장화, 부검용 장갑(cut-proof synthetic mesh gloves) 또는 이중장갑]를 착용해야 하고, 정해진 동선을 통해 이동하도록 한다(Fig. 4). 부검 종료 후

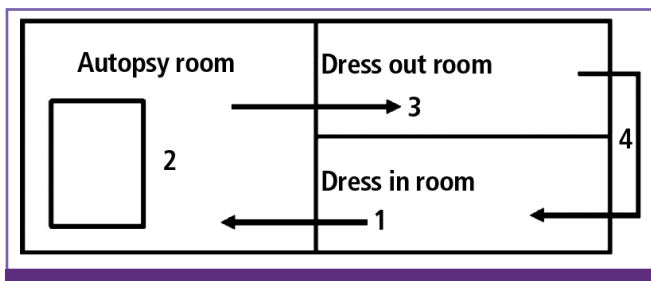

**Figure 4.** 부검시 동선: 외부에서 입고 온 신발과 옷을 수술복으로 바꿔 입고 개인보호구를 착용(1), 부검실로 입장(2), 부검 후 탈의실에서 개인보호구 탈의 후 손위생 수행(3), 부검실 퇴장(4) [11].

**Table 11.** 부검시 에어로졸 생성을 줄이는 방법

|                                              |
|----------------------------------------------|
| 1. 작은 검체를 조작하거나 다룰 때는 생물학적 캐비닛을 사용한다.        |
| 2. 가능한 한 전동톱을 쓰지 않고 사용할 때는 진공장치를 사용한다.       |
| 3. 고압 물분사를 하지 않는다.                           |
| 4. 장(intestine)을 절개할 때는 물속에서 시행한다.           |
| 5. 장기(특히 폐와 위장관)를 조작하거나 세척할 때 물이 튀지 않게 주의한다. |

에는 절개 부위를 봉합하고, 세제와 1:10 비율로 희석한 5% sodium hypochlorite 용액으로 사체를 닦은 후 방수용 사체백에 넣는다.

## 11. 기구 소독

| 핵심 권고안                                                                                     |
|--------------------------------------------------------------------------------------------|
| 1. 가능하면 일회용 기구나 물품을 사용한다(AII).                                                             |
| 2. 세척직원은 고효율마스크, 긴 팔 방수가운, 고글 또는 안면보호구, 모자, 신발덮개 또는 고무장화, 2중 장갑(겉 장갑은 견고한 장갑)을 착용한다(AIII). |
| 3. 소독제 제조사의 권장사항을 확인하여 소독제 희석 및 적용 시간, 소독제 유효기간 및 유효농도 등 권장 기준을 철저히 준수하도록 한다(AIII).        |

메르스 의심/확진 환자의 진료 또는 처치 시에는 가능하면 일회용 기구나 물품을 사용한다(AII) [11]. 일회용 기구나 물품 사용이 어렵다면 재사용 가능 기구나 물품에 한하여 세척, 소독이나 멸균과 같은 일련의 재처리 과정을 거쳐야 한다.

### 1) 세척

사용 후 혈액이나 체액, 분비물, 배설물에 오염된 기구는 세척 시까지 건조되지 않도록 하며, 주변 환경을 오염시키지 않도록 주의하여 세척 장소로 이동시킨다. 세척직원을 보호하기 위하여 세척직원은 고효율마스크, 긴 팔 방수가운, 고글 또는 안면보호구, 모자, 신발덮개 또는 고무장화, 2중 장갑(겉 장갑은 견고한 장갑)을 착용해야 한다(AIII).

### 2) 소독과 멸균

의료기구는 감염의 위험성에 따라 고위험, 준위험, 비위험 기구로 분류하며 분류한 기준에 따라 고위험 기구는 멸균을, 준위험 기구는 높은 수준의 소독 또는 멸균, 비위험 기구는 낮은 수준의 소독을 실시한다. 기구 수준별 소독제 및 멸균 방법은 Table 12와 같으며, 호흡기 분비물의 오염이 큰 호흡기 치료기구의 물품 소독방법의 예는 Table 13과 같다. 비위험 기구의 재사용을 위해서는 낮은 수준의 소독을 시행한다. 유효염소량 500 ppm 이상을 함유한 차아염소산나트륨 또는 4급 암모늄 제제 또는 70-90% 알코올 제제를 이용하여 최소 1분 이상 기구 표면에 소독제가 접촉하도록 한다. 알코올 제제는 휘발성이 강하여 접촉 시간 1분을 유지하기 어려우므로 표면적이 좁은 의료기구의 신속한 소독을 위하여 제한적으로 사용한다.

소독제는 보건복지부고시 [의료기관 사용 기구 및 물품 소독 지침] 제 4조(멸균 및 소독방법)에서 제시한 대로 식품의약품안전처, 미국 FDA, 유럽 CE, 일본 후생성 또는 보건복지부장관이 따로 인정하는 기관에서 인증(허가, 신고, 등록 등 포함)을 득한 제품을 선택하고 사용 시에는 제조사에서 제시하는 방법을 준수하여 소독제 희석 및 적용 시간, 소독제 유효기간 및 유효농도 측정 등 권장 기준을 철저히 준수한다(AIII).

**Table 12.** 멸균 및 소독수준에 따른 적용범위와 방법

| 구분                                                           | 적용 범위      | 방법                                                            | 적용시간                                                                  |                                 |                                                                                                                   |                     |
|--------------------------------------------------------------|------------|---------------------------------------------------------------|-----------------------------------------------------------------------|---------------------------------|-------------------------------------------------------------------------------------------------------------------|---------------------|
| 멸균                                                           | 고위험 기구     | 고온 멸균                                                         | 증기(steam), 건열(dry heat)                                               |                                 |                                                                                                                   |                     |
|                                                              |            | 저온 멸균                                                         | E.O. (ethylene oxide)가스<br>과산화수소 가스플라즈마(hydrogen peroxide gas plasma) |                                 |                                                                                                                   |                     |
|                                                              | 화학 멸균제(침적) | 2% 이상 글루탈알데하이드                                                | 20-25°C, 10시간                                                         |                                 |                                                                                                                   |                     |
|                                                              |            | 7.5% 과산화수소(hydrogen peroxide)                                 | 6시간                                                                   |                                 |                                                                                                                   |                     |
|                                                              |            | 0.2% 과초산(Peracetic acid)                                      | 50분                                                                   |                                 |                                                                                                                   |                     |
|                                                              |            | 과산화수소 과초산 화합물(7.35% hydrogen peroxide + 0.23% peracetic acid) | 3시간                                                                   |                                 |                                                                                                                   |                     |
| 과산화수소 과초산 화합물(1.0% hydrogen peroxide + 0.08% peracetic acid) | 8시간        |                                                               |                                                                       |                                 |                                                                                                                   |                     |
| 높은 수준 소독                                                     | 중위험 기구     | 화학 소독제(침적)                                                    | 2% 이상 글루탈알데하이드                                                        | 2%: 20°C, 20분<br>2.5%: 35°C, 5분 |                                                                                                                   |                     |
|                                                              |            | 0.55% 올소-프탈알데하이드(ortho-phthalaldehyde, OPA)                   | 20°C, 12분<br>25°C, 5분                                                 |                                 |                                                                                                                   |                     |
|                                                              |            | 7.5% 과산화수소 (hydrogen peroxide)                                | 30분                                                                   |                                 |                                                                                                                   |                     |
|                                                              |            | 과산화수소 과초산 화합물(7.35% hydrogen peroxide + 0.23% peracetic acid) | 15분                                                                   |                                 |                                                                                                                   |                     |
|                                                              |            | 과산화수소 과초산 화합물(1.0% hydrogen peroxide + 0.08% peracetic acid)  | 25분                                                                   |                                 |                                                                                                                   |                     |
|                                                              |            | 650-675 ppm 이상 차아염소산염(hypochlorite) (사용장소에서 전기분해로 제조된 것)      | 10분                                                                   |                                 |                                                                                                                   |                     |
|                                                              |            | 중간 수준 소독                                                      | 일부 중위험 기구, 비위험 기구                                                     | 화학 소독제(최소 1분 이상 접촉)             | 유효염소량 1,000 ppm 이상<br>차아염소산나트륨(sodium hypochlorite)<br>페놀계 소독제<br>아이오도퍼 소독제<br>70-90% 알코올 제제(ethanol/isopropanol) |                     |
|                                                              |            |                                                               |                                                                       | 낮은 수준 소독                        | 비위험 기구                                                                                                            | 화학 소독제(최소 1분 이상 접촉) |

**12. 청소 및 환경 관리**

|                                                                                                                                                                                                                                                                                                                                                                                                                                                                                   |
|-----------------------------------------------------------------------------------------------------------------------------------------------------------------------------------------------------------------------------------------------------------------------------------------------------------------------------------------------------------------------------------------------------------------------------------------------------------------------------------|
| <p><b>핵심 권고안</b></p> <ol style="list-style-type: none"> <li>1. 청소나 환경 소독 직원은 감염예방 교육을 받아야 한다(AIII).</li> <li>2. 청소나 환경 소독 직원은 청소나 환경 소독 시 개인 보호구를 착용한다(AIII).</li> <li>3. 분무 소독을 금하고, 깨끗한 타올에 소독제를 충분히 젖도록 하여 1분 이상 환경 표면을 철저히 닦는다(AII).</li> <li>4. 환경소독제로 차아염소산나트륨, 알코올, 페놀 화합물(phenolic compounds), 4급 암모늄 화합물, 과산화물(peroxygen compounds) 등이 적절하다(AIII).</li> <li>5. 환경 소독이 끝나면 시간당 환기 횟수를 고려해 충분히 환기 (시간당 6회 이상 환기 조건에서 최소 2시간 필요)시킨 후 일회용 타올과 걸레로 표면을 닦아낸다(AIII).</li> </ol> |
|-----------------------------------------------------------------------------------------------------------------------------------------------------------------------------------------------------------------------------------------------------------------------------------------------------------------------------------------------------------------------------------------------------------------------------------------------------------------------------------|

1) 일반원칙

청소나 환경 소독 담당 직원은 청소와 환경 소독의 절차와 방법, 중

요성, 환경소독제의 종류와 희석 및 사용 방법, 유효기간 관리 및 준수, 청소용품 세척, 소독, 건조, 보관방법과 사용방법, 보호구 착용과 제거 등 감염예방 교육을 받아야 한다(AIII). 담당 직원은 청소나 환경 소독 시 개인 보호구[고효율마스크 이상의 호흡기 보호장비, 전신보호복 또는 긴 팔 방수가운, 고글 또는 안면보호구, 신발덮개 또는 고무장화, 2중 장갑(겉 장갑은 견고한 장갑)]를 착용해야 한다(AIII).

분무 소독을 금하고, 환경표면을 1분 이상 환경소독제에 충분히 젖게 한 후 환경 표면을 철저히 닦도록 한다(AII) [46]. 청소와 환경 소독 도구는 가능한 일회용을 사용하여 바로 폐기한다. 오염된 환경 표면은 즉시 표면 소독을 시행하고, 환자가 재실하고 있는 환경은 적어도 하루 1회 소독하며 접촉이 빈번한 환경 표면은 자주 소독한다.

2) 소독제

환경소독제는 낮은 수준의 소독제로 충분하며[11], 차아염소산나트륨, 알코올, 페놀 화합물(phenolic compounds), 4급 암모늄 화합물, 과산화물(peroxygen compounds) 등이 포함되며[31, 47], 식품의

**Table 13.** 호흡기 치료기구의 소독과 멸균

| 항목                         | 분류        | 세척                                                                                              | 소독 혹은 멸균                                                                                     | 행균              | 건조/보관                               |
|----------------------------|-----------|-------------------------------------------------------------------------------------------------|----------------------------------------------------------------------------------------------|-----------------|-------------------------------------|
| 흡인통<br>(suction<br>bottle) | 비위험<br>기구 | 흡인액은 비말이 발생하거나 주변 환경에 튀지 않도록 주의하여 액상 폐기물로 처리한다.<br>물리적으로 안과 밖의 표면을 물과 중성세제 또는 효소세척제로 깨끗하게 세척한다. | 낮은 수준의 소독제에 담근다.                                                                             | 수돗물로 깨끗이 행균다.   | 건조 후 보관한다.<br>보관과정에서 오염되지 않도록 주의한다. |
| 산소가습기<br>- flow meter      | 비위험<br>기구 |                                                                                                 | 낮은 수준의 소독제로 닦아준다.                                                                            |                 |                                     |
| 산소가습기<br>- bottle          | 준위험<br>기구 | 물리적으로 안과 밖의 표면을 물과 중성세제 또는 효소세척제로 깨끗하게 세척한다.                                                    | 높은 수준의 소독제에 내부 표면이 접촉될 수 있도록 담근다.                                                            | 증류수로 행균다.       | 건조 후 보관한다.<br>보관과정에서 오염되지 않도록 주의한다. |
| 인공호흡기<br>- circuit         | 준위험<br>기구 | 물리적으로 안과 밖의 표면을 물과 중성세제 또는 효소세척제로 깨끗하게 세척한다.                                                    | 높은 수준의 소독제에 담근다 (소독제와의 접촉 시간은 제조사의 권고에 따름).<br>건조시킨 후 중앙공급실에 멸균 (E.O. 가스멸균, 가스플라즈마멸균)을 의뢰한다. | 증류수로 행균다.       | 건조 후 보관한다.<br>보관과정에서 오염되지 않도록 주의한다. |
| 인공호흡기<br>표면                | 비위험<br>기구 |                                                                                                 | 낮은 수준의 소독제로 닦아준다.                                                                            |                 |                                     |
| Laryngoscope<br>blade      | 준위험<br>기구 | 물리적으로 안과 밖의 표면을 물과 중성세제 또는 효소세척제로 깨끗하게 세척한다.                                                    | 높은 수준의 소독제에 담근다 (소독제와의 접촉 시간은 제조사의 권고에 따름).<br>건조시킨 후 중앙공급실에 멸균 (E.O. 가스멸균, 가스플라즈마멸균)을 의뢰한다. | 멸균증류수로 깨끗이 행균다. | 건조 후 보관한다.<br>보관과정에서 오염되지 않도록 주의한다. |
| Laryngoscope<br>handle     | 비위험<br>기구 |                                                                                                 | 낮은 수준의 소독제로 닦아준다.                                                                            |                 |                                     |
| Resuscitation<br>bag       | 준위험<br>기구 | 물리적으로 표면을 물과 중성세제 또는 효소세척제로 깨끗하게 세척한다.<br>세척 시 백과 입구를 분리하여 꼼꼼히 세척한다.                            | 건조 후 중앙공급실에 멸균을 의뢰한다.                                                                        |                 |                                     |

약품안전처에서 허가된 바이러스용 소독제를 사용할 수 있다(<http://ezdrug.mfds.go.kr>) (AIII). 환경소독제 사용 시에는 제조사에서 제시한 희석 비율, 접촉 시간, 취급 주의사항 등의 권장사항을 따른다. 차아염소산나트륨을 사용할 경우 시중에 판매하는 5% 락스를 100배 희석하여 유효염소 농도를 0.05% 또는 500 ppm으로 만든다.

3) 퇴원 후 종결 소독

의료기관에서 가능하면 전담 청소요원을 배정하여 교육하고 청소와 환경 소독 과정을 모니터링 한다.

비투과성 표면(천장과 조명 포함)은 0.05% (500 ppm) 차아염소산 또는 이에 상응하는 의료용 환경소독제를 적신 일회용 타올 또는 걸레로 철저히 닦는다. 직물재질과 같은 투과성 표면은 새 것으로 교체한다. 사용한 직물재질은 폐기하거나 폐기가 어렵다면 0.05% (500 ppm) 차아염소산 소독액에 30분 침적한다. 환경 표면 소독을 위하여

비투과성, 투과성 표면에 H<sub>2</sub>O<sub>2</sub> vapor, H<sub>2</sub>O<sub>2</sub> dry mist 등을 사용할 수 있다. 안전을 위해 잘 훈련된 사용자가 필요하고 제조사의 방침을 엄격히 준수해야 한다.

소독이 끝나면 시간당 환기 횟수를 고려해 충분히 환기해야 한다. 시간 당 6회 이상 환기 조건에서 최소 2시간 이상 환기를 한 후 물에 적신 깨끗한 일회용 타올과 걸레로 표면을 닦아낸다(AII) [28]. 체크 리스크로 점검 후 새로운 환자를 받을 수 있다.

13. 세탁물과 직원 근무복 관리

|                                                                                           |
|-------------------------------------------------------------------------------------------|
| <p><b>핵심 권고안</b></p> <p>1. 세탁물을 관리하는 담당 직원에 대해 감염관리 교육을 시행하고, 정기적인 점검을 시행해야 한다(AIII).</p> |
|-------------------------------------------------------------------------------------------|



2. 세탁물을 취급하는 직원은 적절한 개인보호구를 착용하도록 한다(AII).
3. 사용한 세탁물은 오염되는 것을 방지하기 위해 격리실 내에서 최소한으로 조작하여 수집자루(용기)에 담는다(AII).
4. 직원 근무복은 의료기관세탁물로 분류하여 세탁한다(BII).

세탁물을 관리하는 담당 직원에 대해 감염관리 교육을 시행하고, 안전한 방법으로 세탁물 관리가 이루어지는지 정기적인 점검을 시행해야 한다(AIII). 오염된 세탁물을 취급하는 직원은 개인보호구를 착용하고, 개인보호구 제거 후 손위생을 수행한다(AII) [11]. 의료기관에서 직원과 환자가 사용하는 세탁물은 관계 법령에 따라 세탁 후 재사용하는데, 의료기관에서 세탁물을 사용, 보관, 운반, 혹은 처리하는 과정에서 병원성 미생물에 오염될 수 있으므로 주의가 필요하다. 사용한 세탁물은 오염되는 것을 방지하기 위해 격리실 내에서 최소한으로 조작하여 수집자루(용기)에 담는다(AII) [11]. 메르스 환자가 사용한 세탁물은 오염된 세탁물이므로, 오염된 세탁물이 주변 환경이나 사람에게 노출되지 않도록 처리하는 것이 중요하다. 세탁물은 고온 세탁 시 최소 25분 동안 70°C에서 세제나 소독제를 이용하여 세탁하고, 70°C 미만의 저온 세탁을 할 경우 적절한 농도의 화학물질을 사용하여 세탁한다. 적절한 방법으로 세탁물을 수집, 운반, 분류, 세탁, 보관할 수 없는 경우 의료폐기물 처리절차에 따라 폐기한다.

메르스 환자를 담당하는 의료진은 미생물에 대한 노출 위험이 있고 여러 가지 개인보호구를 착용해야 하므로, 의료기관에서는 이를 고려하여 직원의 근무복을 선택해야 한다. 직원 근무복은 의료기관 세탁물로 분류하여 세탁한다(BII) [11].

#### 14. 식기 관리

##### 핵심 권고안

1. 환자가 사용한 식기는 격리실 내에서 용기 혹은 봉지에 담아, 주변 환경이나 사람을 오염 시키지 않게 수거한다(BIII).
2. 재사용 식기의 경우 식기세척기로 세척하거나, 식기세척기를 사용할 수 없다면 개인보호구를 적절히 착용한 후 손세척을 한다(BIII).
3. 가능하다면 일회용 식기를 사용하고, 사용 후에는 의료폐기물로 분류하여 폐기한다(BIII).

메르스 의심/확진 환자가 사용한 식기는 관련 법령에 따라 일반적인 식기 관리 절차와 동일하게 관리한다. 환자가 사용한 식기는 격리실 내에서 용기 혹은 봉지에 담아, 주변 환경이나 사람을 오염시키지 않게 수거한다(BIII). 단, 메르스 코로나바이러스에 대한 노출을 최소화하기 위해 가능하다면 일회용 식기를 사용한 후 폐기하는 것이 권고된다(BIII). 재사용 식기의 경우 식기세척기에서 뜨거운 물과 세제를 이용하여 세척하거나, 식기세척기를 사용할 수 없는 경우 적절한 개인보호장비를 착용한 후 세제를 이용하여 손으로 세척한다(BIII). 환자가 사용한 식기는 메르스 코로나바이러스로 오염되어 있을 가

능성이 있으므로 식기를 수거할 때에는 노출되지 않도록 주의한다(BIII).

#### 15. 의료폐기물 관리

##### 핵심 권고안

1. 메르스 환자의 혈액이나 체액으로 오염된 의료폐기물은 전용 용기를 사용해 밀폐 포장하고, 외부 표면을 소독한 후 보관 장소로 운반한다(AIII).
2. 의료기관은 폐기물을 취급하는 직원에게 감염예방 교육을 시행하고, 폐기물을 취급하는 직원은 적절한 개인보호구를 착용해야 한다(AII).

메르스 환자의 혈액이나 체액으로 오염된 폐기물이 주변 환경 또는 사람에게 노출되어 바이러스가 전파되는 것을 예방하기 위한 주의가 필요하다. 관련 법령에 따라 격리 의료폐기물로 분류해서 폐기해야 한다. 폐기물은 전용 용기를 사용해 밀폐 포장하고, 메르스 코로나바이러스의 주변환경 노출을 최소화하기 위해서 외부 표면을 소독한 후 보관장소로 운반한다(AIII). 의료기관은 폐기물을 취급하는 직원에게 감염예방 교육을 시행하고, 폐기물 처리 직원은 적절한 개인보호구(고효율마스크, 장갑, 고글 또는 안면보호구, 소매를 덮는 가운)를 착용해야 한다(AII) [11]. 환자의 체액이나 배설물은 주변으로 튀지 않게 주의해서 하수구를 통해 폐기한다.

#### 요 약

메르스는 새로운 betacoronavirus (메르스 코로나바이러스)에 의해 발생되며 높은 사망률을 보이는 급성 호흡기 감염병이다. 2012년 사우디아라비아에서 첫 환자가 보고된 이래로 병원내 감염과 병원 간 전파를 통해 대규모 유행이 보고되어 왔으며, 국내에서도 대부분 병원내 감염을 통해 환자가 발생하였다. 따라서, 메르스의 유행을 차단하기 위해서는 올바른 감염관리 수칙을 엄격히 준수하는 것이 필수적이다. 본 지침은 메르스 유행이 발생한 국내 병원의 감염관리 경험과 국내외 감염관리지침을 반영하여 만들어졌다. 메르스 코로나바이러스 감염에 대한 효과적인 감염관리가 이루어질 수 있도록 조직구성, 병원시설, 접촉자관리, 손위생 및 개인보호구, 소독, 청소 및 환경관리 등의 내용을 포괄적으로 다루었다.

#### 제한점

본 지침은 체계적 문헌고찰을 통해 최대한 많은 문헌을 검색하여 메르스 감염관리 권고안을 만들고자 하였으나 근거로 삼을 수 있는 연구 결과가 매우 제한적이었다. 2015년 국내 메르스 유행과 관련해 향후 발표될 연구 결과를 근거로 지침을 개정하는 것이 필요하다. 또한, 본 지침의 적용은 개별 상황에 따라서 달라질 수 있으며, 구체적인

개별적인 상황을 고려해 전문가의 의견을 반영해야 한다.

## 개정계획

본 감염관리지침은 적절한 근거가 될 수 있는 최신 연구 결과를 반영해 2년마다 정기적으로 개정할 계획이며, 중요한 연구 결과가 보고 되는 경우에 개정 시기를 조정할 수 있다.

## 이해관계

본 지침의 개발은 대한감염학회, 대한의료관련감염관리학회, 대한감염관리간호사회의 지원에 의해 이루어졌다. 본 지침 개발 및 검토에 참여한 위원은 최종 권고안에 영향을 미치는 연구비 지원을 받지 않았고 특정 이익단체의 영향도 받지 않았음을 밝힌다.

## 감사의 글

메르스 감염관리지침 개발을 지원하고, 검토 의견을 주신 대한감염학회, 대한의료관련감염관리학회, 대한감염관리간호사회 임원 선생님들께 진심으로 감사드립니다.

## References

1. The Korean Society of Infectious Diseases, and Korean Society for Healthcare-associated Infection Control and Prevention. An unexpected outbreak of Middle East respiratory syndrome coronavirus infection in the Republic of Korea, 2015. *Infect Chemother* 2015;47:120-2.
2. Chong YP, Song JY, Seo YB, Choi JP, Shin HS, Rapid Response Team. Antiviral treatment guidelines for Middle East respiratory syndrome. *Infect Chemother* 2015;47:212-22.
3. Cowling BJ, Park M, Fang VJ, Wu P, Leung GM, Wu JT. Preliminary epidemiological assessment of MERS-CoV outbreak in South Korea, May to June 2015. *Euro Surveill* 2015;20:7-13.
4. Oboho IK, Tomczyk SM, Al-Asmari AM, Banjar AA, Al-Mugti H, Aloraini MS, Alkhalidi KZ, Almohammadi EL, Alraddadi BM, Gerber SI, Swerdlow DL, Watson JT, Madani TA. 2014 MERS-CoV outbreak in Jeddah--a link to health care facilities. *N Engl J Med* 2015;372:846-54.
5. Jefferson T, Del Mar CB, Dooley L, Ferroni E, Al-Ansary LA, Bawazeer GA, van Driel ML, Nair S, Jones MA, Thornton S, Conly JM. Physical interventions to interrupt or reduce the spread of respiratory viruses. *Cochrane Database Syst Rev* 2011:CD006207.
6. Rasmussen SA, Gerber SI, Swerdlow DL. Middle East respiratory syndrome coronavirus: update for clinicians. *Clin Infect Dis* 2015;60:1686-9.
7. World Health Organization (WHO). Infection prevention and control during health care for probable and confirmed cases of novel coronavirus (nCoV) infection. Available at: [http://www.who.int/csr/disease/coronavirus\\_infections/IPcCoVguidance\\_06May13.pdf](http://www.who.int/csr/disease/coronavirus_infections/IPcCoVguidance_06May13.pdf). Accessed 16 July 2015.
8. Aliabadi AA, Rogak SN, Bartlett KH, Green SI. Preventing airborne disease transmission: review of methods for ventilation design in health care facilities. *Adv Prev Med* 2011; 2011:124064.
9. Azhar EI, Hashem AM, El-Kafrawy SA, Sohrab SS, Aburizaiza AS, Farraj SA, Hassan AM, Al-Saeed MS, Jamjoom GA, Madani TA. Detection of the Middle East respiratory syndrome coronavirus genome in an air sample originating from a camel barn owned by an infected patient. *MBio* 2014;5:e01450-14.
10. World Health Organization (WHO). Middle East respiratory syndrome coronavirus (MERS-CoV): update. Available at: [http://www.who.int/csr/don/2014\\_04\\_11\\_mers/en/#](http://www.who.int/csr/don/2014_04_11_mers/en/#). Accessed 16 July 2015.
11. World Health Organization (WHO). Infection prevention and control of epidemic-and pandemic prone acute respiratory infections in health care: WHO guidelines. Available at: [http://www.who.int/csr/bioriskreduction/infection\\_control/publication/en/](http://www.who.int/csr/bioriskreduction/infection_control/publication/en/). Accessed 16 July 2015.
12. Hughes JM. Study on the efficacy of nosocomial infection control (SENIC Project): results and implications for the future. *Chemotherapy* 1988;34:553-61.
13. Health information and quality authority (HIQA). National standards for the prevention and control of healthcare associated infections. Available at: [http://www.hiqa.ie/system/files/National\\_Standards\\_Prevention\\_Control\\_Infections.pdf](http://www.hiqa.ie/system/files/National_Standards_Prevention_Control_Infections.pdf). Accessed 16 July 2015.
14. Madge P, Paton JY, McColl JH, Mackie PL. Prospective controlled study of four infection-control procedures to prevent nosocomial infection with respiratory syncytial virus. *Lancet* 1992;340:1079-83.
15. Public Health Agency of Canada. Interim guidance-middle east respiratory syndrome coronavirus (MERS-Cov). Available at: <http://www.phac-aspc.gc.ca/eri-ire/coronavirus/guidance-directives/nCoV-ig-dp-eng.php>. Accessed 16 July 2015.
16. Chen M, Leo YS, Ang B, Heng BH, Choo P. The outbreak of SARS at Tan Tock Seng Hospital--relating epidemiology to control. *Ann Acad Med Singapore* 2006;35:317-25.

17. Lau JT, Fung KS, Wong TW, Kim JH, Wong E, Chung S, Ho D, Chan LY, Lui SF, Cheng A. SARS transmission among hospital workers in Hong Kong. *Emerg Infect Dis* 2004;10: 280-6.
18. Larson EL, Bryan JL, Adler LM, Blane C. A multifaceted approach to changing handwashing behavior. *Am J Infect Control* 1997;25:3-10.
19. Pittet D, Hugonnet S, Harbarth S, Mourouga P, Sauvan V, Touveneau S, Perneger TV. Effectiveness of a hospital-wide programme to improve compliance with hand hygiene. *Infection Control Programme. Lancet* 2000;356: 1307-12.
20. World Health Organization (WHO). Essential environmental health standards in health care. Available at: [http://www.who.int/water\\_sanitation\\_health/hygiene/settings/ehs\\_hc/en/](http://www.who.int/water_sanitation_health/hygiene/settings/ehs_hc/en/). Accessed 16 July 2015.
21. World Health Organization (WHO). Natural ventilation for infection control in health-care settings: WHO guidelines 2009. Available at: [http://www.who.int/water\\_sanitation\\_health/publications/natural\\_ventilation/en/index.html](http://www.who.int/water_sanitation_health/publications/natural_ventilation/en/index.html). Accessed 16 July 2015.
22. Booth TF, Kournikakis B, Bastien N, Ho J, Kobasa D, Staden L, Li Y, Spence M, Paton S, Henry B, Mederski B, White D, Low DE, McGeer A, Simor A, Vearncombe M, Downey J, Jamieson FB, Tang P, Plummer F. Detection of airborne severe acute respiratory syndrome (SARS) coronavirus and environmental contamination in SARS outbreak units. *J Infect Dis* 2005;191:1472-7.
23. Lai MY, Cheng PK, Lim WW. Survival of severe acute respiratory syndrome coronavirus. *Clin Infect Dis* 2005;41: e67-71.
24. Pang X, Zhu Z, Xu F, Guo J, Gong X, Liu D, Liu Z, Chin DP, Feikin DR. Evaluation of control measures implemented in the severe acute respiratory syndrome outbreak in Beijing, 2003. *JAMA* 2003;290:3215-21.
25. Centers for Disease Control and Prevention (CDC). Respiratory hygiene/cough etiquette in healthcare settings. Available at: <http://www.cdc.gov/flu/professionals/infectioncontrol/resphygiene.htm>. Accessed 16 July 2015.
26. Gopalakrishna G, Choo P, Leo YS, Tay BK, Lim YT, Khan AS, Tan CC. SARS transmission and hospital containment. *Emerg Infect Dis* 2004;10:395-400.
27. Hui DS, Peiris M. Middle East Respiratory Syndrome. *Am J Respir Crit Care Med* 2015;192:278-9.
28. Jensen PA, Lambert LA, Iademarco MF, Ridzon R, Cdc. Guidelines for preventing the transmission of Mycobacterium tuberculosis in health-care settings, 2005. *MMWR Recomm Rep* 2005;54:1-141.
29. Leung TF, Ng PC, Cheng FW, Lyon DJ, So KW, Hon EK, Li AM, Li CK, Wong GW, Nelson EA, Hui J, Sung RY, Yam MC, Fok TF. Infection control for SARS in a tertiary paediatric centre in Hong Kong. *J Hosp Infect* 2004;56:215-22.
30. Garner JS. Guideline for isolation precautions in hospitals. The Hospital Infection Control Practices Advisory Committee. *Infect Control Hosp Epidemiol* 1996;17:53-80.
31. Centers for Disease Control and Prevention (CDC). Interim infection prevention and control recommendations for hospitalized patients with Middle East respiratory syndrome coronavirus (MERS-CoV). Available at: <http://www.cdc.gov/coronavirus/mers/downloads/MERS-Infection-Control-Guidance-051414.pdf>. Accessed 16 July 2015.
32. Siegel JD, Rhinehart E, Jackson M, Chiarello L; Health Care Infection Control Practices Advisory Committee. 2007 guideline for isolation precautions: preventing transmission of infectious agents in health care settings. *Am J Infect Control* 2007;35 (10 Suppl 2):S65-164.
33. Public Health England. MERS-CoV: infection control for possible or confirmed cases. Available at: <https://www.gov.uk/government/publications/merscov-infection-control-for-possible-or-confirmed-cases>. Accessed 16 July 2015.
34. Ministry of Health Saudi Arabia. Infection prevention/control and management guidelines for patients with Middle East Respiratory Syndrome Coronavirus (MERS-CoV) Infection. Available at: <http://www.moh.gov.sa/en/CCC/StaffRegulations/Corona/Documents/Guidelines-forCoronaPatients.pdf>. Accessed 16 July 2015.
35. Healthcare Infection Control Practices Advisory Committee. 2007 guideline for isolation precautions: preventing transmission of infectious agents in healthcare settings Available at: <http://www.cdc.gov/hicpac/pdf/isolation/Isolation2007.pdf>. Accessed 16 July 2015.
36. Tran K, Cimon K, Severn M, Pessoa-Silva CL, Conly J. Aerosol generating procedures and risk of transmission of acute respiratory infections to healthcare workers: a systematic review. *PLoS One* 2012;7:e35797.
37. Khoo KL, Leng PH, Ibrahim IB, Lim TK. The changing face of healthcare worker perceptions on powered air-purifying respirators during the SARS outbreak. *Respirology* 2005;10:107-10.
38. Sehulster L, Chinn RY; CDC; HICPAC. Guidelines for environmental infection control in health-care facilities. Recommendations of CDC and the Healthcare Infection Con-

- trol Practices Advisory Committee (HICPAC). *MMWR Recomm Rep* 2003;52:1-42.
39. Assiri A, Al-Tawfiq JA, Al-Rabeeh AA, Al-Rabiah FA, Al-Hajjar S, Al-Barrak A, Flemban H, Al-Nassir WN, Balkhy HH, Al-Hakeem RF, Makhdoom HQ, Zumla AI, Memish ZA. Epidemiological, demographic, and clinical characteristics of 47 cases of Middle East respiratory syndrome coronavirus disease from Saudi Arabia: a descriptive study. *Lancet Infect Dis* 2013;13:752-61.
  40. Guery B, Poissy J, el Mansouf L, Séjourné C, Ettahar N, Lemaire X, Vuotto F, Goffard A, Behillil S, Enouf V, Caro V, Mailles A, Che D, Manuguerra JC, Mathieu D, Fontanet A, van der Werf S: MERS-CoV study group. Clinical features and viral diagnosis of two cases of infection with Middle East Respiratory Syndrome coronavirus: a report of nosocomial transmission. *Lancet* 2013;381:2265-72.
  41. Krumkamp R, Duerr HP, Reintjes R, Ahmad A, Kassen A, Eichner M. Impact of public health interventions in controlling the spread of SARS: modelling of intervention scenarios. *Int J Hyg Environ Health* 2009;212:67-75.
  42. Yen MY, Lin YE, Lee CH, Ho MS, Huang FY, Chang SC, Liu YC. Taiwan's traffic control bundle and the elimination of nosocomial severe acute respiratory syndrome among healthcare workers. *J Hosp Infect* 2011;77:332-7.
  43. Yen MY, Lu YC, Huang PH, Chen CM, Chen YC, Lin YE. Quantitative evaluation of infection control models in the prevention of nosocomial transmission of SARS virus to healthcare workers: implication to nosocomial viral infection control for healthcare workers. *Scand J Infect Dis* 2010;42:510-5.
  44. Chen SY, Chiang WC, Ma MH, Su CP, Hsu CY, Ko PC, Tsai KC, Yen ZS, Shih FY, Chen SC, Lin SJ, Wang JL, Chang SC, Chen WJ. Sequential symptomatic analysis in probable severe acute respiratory syndrome cases. *Ann Emerg Med* 2004;43:27-33.
  45. Nolte KB, Taylor DG, Richmond JY. Biosafety considerations for autopsy. *Am J Forensic Med Pathol* 2002;23:107-22.
  46. Medcraft JW, Hawkins JM, Fletcher BN, Dadswell JV. Potential hazard from spray cleaning of floors in hospital wards. *J Hosp Infect* 1987;9:151-7.
  47. Centers for Disease Control and Prevention (CDC). Healthcare Infection Control Practices Advisory Committee (HICPAC). Guideline for Disinfection and Sterilization in Healthcare Facilities, 2008. Available at: [http://www.cdc.gov/hicpac/Disinfection\\_Sterilization/toc.html](http://www.cdc.gov/hicpac/Disinfection_Sterilization/toc.html). Accessed 16 July 2015.
